1 **Asexual but not clonal: evolutionary processes in**  
2 **populations with automictic reproduction**

3

4 Jan Engelstädter

5

6 School of Biological Sciences, The University of Queensland, Brisbane, Australia

7

8

9 Address: The University of Queensland, School of Biological Sciences, Brisbane,

10 QLD 4072, Australia

11 Phone: +61 7 336 57959

12 Email: [j.engelstaedter@uq.edu.au](mailto:j.engelstaedter@uq.edu.au)

13

14

15 Conflict of interest statement: The author declares no conflict of interest.

16

17 Keywords: automixis, parthenogenesis, neutral genetic variation, overdominance,

18 mutation-selection balance, central fusion automixis

## 19 **Abstract**

20 Many parthenogenetically reproducing animals produce offspring not clonally but  
21 through different mechanisms collectively referred to as automixis. Here, meiosis  
22 proceeds normally but is followed by the fusion of meiotic products that restores  
23 diploidy. This mechanism typically leads to a reduction in heterozygosity among the  
24 offspring compared to the mother. Following a derivation of the rate at which  
25 heterozygosity is lost at one and two loci, depending on the number of crossovers  
26 between loci and centromere, a number of models are developed to gain a better  
27 understanding of basic evolutionary processes in automictic populations. Analytical  
28 results are obtained for the expected equilibrium neutral genetic diversity, mutation-  
29 selection balance, selection with overdominance, the rate of spread of beneficial  
30 mutations, and selection on crossover rates. These results are complemented by  
31 numerical investigations elucidating how associative overdominance (two off-phase  
32 deleterious mutations at linked loci behaving like an overdominant locus) can in some  
33 cases maintain heterozygosity for prolonged times, and how clonal interference  
34 affects adaptation in automictic populations. These results suggest that although  
35 automictic populations are expected to suffer from the lack of gene shuffling with  
36 other individuals, they are nevertheless in some respects superior to both clonal and  
37 outbreeding sexual populations in the way they respond to beneficial and deleterious  
38 mutations. Implications for related genetic systems such as intratetrad mating, clonal  
39 reproduction, selfing as well as different forms of mixed sexual and automictic  
40 reproduction are discussed.

41

## 42 **Introduction**

43 The vast majority of animals and plants reproduce via the familiar mechanism of sex  
44 (BELL 1982): haploid gametes are produced through meiosis, and these fuse to form  
45 diploid offspring that are a genetic mix of their parents. Conversely, bacteria, many  
46 unicellular and some multicellular eukaryotes reproduce clonally, i.e. their offspring  
47 are genetically identical to their mother. These two extreme genetic systems can also  
48 be alternated, e.g. a few generations of clonal reproduction followed by one round of  
49 sexual reproduction. Such systems are found in many fungi (e.g., yeast) but also in  
50 animals such as aphids that exhibit ‘cyclical parthenogenesis’. However, there are  
51 also genetic systems that resist an easy classification into ‘sexual’ and ‘asexual’.  
52 Among them are automixis and related systems in which a modified meiosis takes  
53 place in females, leading to offspring that develop from unfertilized but diploid eggs  
54 and that may be genetically diverse and distinct from their mother (STENBERG and  
55 SAURA 2009; SUOMALAINEN *et al.* 1987). Explicably, there is much confusion and  
56 controversy about terminology in such systems, with some authors referring to them  
57 as asexual (because there is no genetic mixing between different lineages) and others  
58 as sexual (e.g., because they involve a form of meiosis and/or resemble selfing).  
59 Without entering this debate, I will adopt the former convention here, acknowledging  
60 that the latter is also valid and useful in some contexts. Also note that clonal,  
61 ‘ameiotic’ reproduction in animals is usually referred to as apomixis but that this term  
62 has a different meaning in plants (ASKER and JERLING 1992; VAN DIJK 2009).

63 A good starting point for understanding automixis is to consider a specific system,  
64 and one that is particularly well-studied is the South African honeybee subspecies  
65 *Apis mellifera capensis*, the Cape honeybee (reviewed in GOUDIE and OLDROYD  
66 2014). Within *A. m. capensis*, workers can lay unfertilized eggs that develop  
67 parthenogenetically into diploid female offspring via a mechanism called ‘central

68 fusion' (SUOMALAINEN *et al.* 1987; VERMA and RUTTNER 1983). Here, meiosis occurs  
69 normally producing four haploid nuclei, but diploidy is then restored through fusion  
70 of the egg pronucleus with the polar body separated in meiosis I. This means that in  
71 the absence of recombination between a given locus and its associated centromere, the  
72 maternal allelic state at this locus is restored and in particular, heterozygosity is  
73 maintained. However, crossover events between a locus and its centromere can erode  
74 maternal heterozygosity, leading to offspring that are homozygous for one allele (see  
75 below for details and Fig.1). Although workers can produce diploid female offspring  
76 asexually, queens (which may be the daughters of workers) still mate and reproduce  
77 sexually. However, this system has also given rise to at least three lineages (two  
78 historical and one contemporaneous) that reproduce exclusively through central  
79 fusion automixis and parasitize colonies of another, sexual honeybee subspecies (*A.*  
80 *m. scutellata*). The contemporaneous lineage (colloquially referred to as the "Clone"  
81 in the literature) appeared in 1990 and has been spreading rapidly since, causing the  
82 collapse of commercial *A. m. scutellata* colonies in South Africa (the 'Capensis  
83 Calamity': ALLSOPP 1992). Heterozygosity levels are surprisingly high in this lineage  
84 given its mode of automictic reproduction (BAUDRY *et al.* 2004; OLDROYD *et al.*  
85 2011). Initially, it was hypothesized that this is due to suppression of recombination  
86 (BAUDRY *et al.* 2004; MORITZ and HABERL 1994), as this would make central fusion  
87 automixis akin to clonal reproduction. However, more recent work indicates that it is  
88 more likely that natural selection actively maintains heterozygosity (GOUDIE *et al.*  
89 2012; GOUDIE *et al.* 2014).

90 Several other species also reproduce exclusively or facultatively through central  
91 fusion automixis, including other hymenopterans (e.g., BELSHAW and QUICKE 2003;  
92 BEUKEBOOM and PIJNACKER 2000; OXLEY *et al.* 2014; PEARCY *et al.* 2006; RABELING  
93 and KRONAUER 2013), some dipterans (MARKOW 2013; MURDY and CARSON 1959;

94 STALKER 1954; STALKER 1956), moths (SEILER 1960; SUOMALAINEN *et al.* 1987),  
95 crustaceans (NOUGUE *et al.* 2015), and nematodes (VAN DER BEEK *et al.* 1998).  
96 Another mechanism of automictic parthenogenesis is terminal fusion. Here, the egg  
97 pronucleus fuses with its sister nucleus in the second-division polar body to form the  
98 zygote. With this mechanism, offspring from heterozygous mothers will become  
99 homozygous for either allele in the absence of recombination, but may retain maternal  
100 heterozygosity when there is recombination between locus and centromere. Terminal  
101 fusion automixis has been reported for example in mayflies (SEKINE and TOJO 2010),  
102 termites (MATSUURA *et al.* 2004), and oribatid mites (HEETHOFF *et al.* 2009). (Note  
103 however that in mites with terminal fusion automixis, meiosis may be inverted so that  
104 the consequences are the same as for central fusion (WRENSCH *et al.* 1994).)  
105 Terminal fusion also seems to be the only confirmed mechanism of facultative  
106 parthenogenesis in vertebrates (reviewed in LAMPERT 2008). The most extreme  
107 mechanism of automixis is gamete duplication. Here, the egg undergoes either a  
108 round of chromosome replication without nuclear division or a mitosis followed by  
109 fusion of the resulting two nuclei. In both cases, the result is a diploid zygote that is  
110 completely homozygous at all loci. Gamete duplication has been reported in several  
111 groups of arthropods and in particular is frequently induced by inherited bacteria  
112 (*Wolbachia*) in hymenopterans (GOTTLIEB *et al.* 2002; PANNEBAKKER *et al.* 2004;  
113 STOUTHAMER and KAZMER 1994). Finally, there are a number of genetic systems that  
114 are cytologically distinct from automixis but genetically equivalent or similar (see  
115 Discussion).  
116 The peculiar mechanisms of automixis raise a number of questions. At the most basic  
117 level, one could ask why automixis exists at all. If there is selection for asexual  
118 reproduction, why not simply skip meiosis and produce offspring that are identical to  
119 their mother? Are there any advantages to automixis compared to clonal reproduction,

120 or are there mechanistic constraints that make it difficult to produce eggs mitotically?  
121 How common is automixis, and how can it be detected and distinguished from other  
122 modes of reproduction using population genetic methods? What is the eventual fate of  
123 populations reproducing via automixis? Are the usual long-term problems faced by  
124 populations that forego genetic mixing (such as Muller's ratchet or clonal  
125 interference) compounded in automictic populations because they also suffer from a  
126 form of inbreeding depression due to the a perpetual loss of heterozygosity, or can the  
127 loss of heterozygosity also be beneficial in some circumstances?  
128 Answering these questions requires a firm understanding of how key evolutionary  
129 forces such as selection and drift operate in automictic populations. Although a few  
130 studies have yielded important insights into this issue, these studies have been limited  
131 to specific settings, e.g. dealing with the initial fitness of automictic mutants  
132 (ARCHETTI 2004), selective maintenance of heterozygosity (GOUDIE *et al.* 2012), or  
133 the 'contagious' generation of new automictic lineages in the face of conflicts with  
134 the sex determination mechanism (ENGELSTÄDTER *et al.* 2011). Here, I develop  
135 mathematical models and report a number of analytical and numerical results on the  
136 evolutionary genetics in automictic populations. As a foundation, I first (re-)derive the  
137 expected distribution of offspring genotypes with up to two loci and under different  
138 modes of automixis in relation to crossover frequencies. Next, results on several  
139 statistics describing neutral genetic diversity are derived. I then investigate how  
140 natural selection on deleterious, overdominant and beneficial mutations operates in  
141 automictic populations. Finally, using the previous results I investigate the evolution  
142 of recombination suppression in automicts, a process that in extreme cases might  
143 effectively turn automictic into clonal reproduction.

144

## 145 **Models and Results**

### 146 **Recombination and loss of heterozygosity**

147 For a single locus, the relationship between crossover rates and loss of heterozygosity  
148 during automixis has been previously analyzed by several authors (ENGELSTÄDTER *et*  
149 *al.* 2011; PEARCY *et al.* 2006; PEARCY *et al.* 2011), so only a brief summary will be  
150 given here. The process can be understood by considering two steps. First, crossover  
151 events between the focal locus and its associated centromere during prophase I may or  
152 may not produce ‘recombinant’ genotypic configurations following meiosis I  
153 prophase (Fig. 1A). Second, the resulting configuration (Fig. 1B) may then either  
154 retain the original heterozygous state or be converted into a homozygous state (Fig.  
155 1C).

156 In step 1, crossovers induce switches between two possible configurations (Fig. 1A).  
157 A crossover invariably produces a transition from the original state where sister  
158 chromatids carry the same allele to the state where sister chromatids carry different  
159 alleles, but only produces the reverse transition with probability 1/2. Based on this, it  
160 can be shown that with  $n$  crossovers, the probability of arriving in the ‘recombinant’  
161 state is

$$162 \quad r(n) = \frac{2}{3} \left( 1 - \left( -\frac{1}{2} \right)^n \right). \quad (1)$$

163 If we assume a Poisson distribution of crossover events with a mean of  $\bar{n}$ , we obtain

$$164 \quad \bar{r}(\bar{n}) = \frac{2}{3} \left( 1 - e^{-3\bar{n}/2} \right) \quad (2)$$

165 as the expected fraction of recombinant configurations. Of course, more complex  
166 distributions that take crossover interference into account could also be applied to Eq.  
167 (1) (SVENDSEN *et al.* 2015). It can be seen from Eqs. (1) and (2) that when the number  
168 of crossovers increases (i.e., with increasing distance of the locus from the  
169 centromere), the expected fraction of recombinant configurations converges to 2/3.

170 In step 2, the meiotic products form diploid cells through different mechanisms,  
171 resulting in three possible genotypes in proportions as shown in Fig. 1C. Combining  
172 Eq. (3) with these probabilities yields the following overall probabilities of conversion  
173 from heterozygosity in the mother to homozygosity in her offspring for central fusion  
174 (CF), terminal fusion (TF) and gamete duplication (GD) automixis:

$$175 \quad \gamma^{CF} = \frac{1}{3} \left( 1 - e^{-\frac{3\bar{n}}{2}} \right), \quad \gamma^{TF} = \frac{1}{3} \left( 1 + 2e^{-\frac{3\bar{n}}{2}} \right), \quad \gamma^{GD} = 1. \quad (3)$$

176 These equations can also be expressed in terms of map distance  $d$  (in Morgans)  
177 between the locus and its centromere that may be known in sexual conspecifics or  
178 related sexual species. This is done simply by replacing  $\bar{n}$  with  $2d$ .

179 Let us next consider two loci. Offspring proportions when at most one locus is  
180 heterozygous can be readily deduced from the single-locus case outlined above.  
181 Similarly, when the two loci are on different chromosomes, predicting offspring  
182 proportions is relatively straightforward because homozygosity will be attained  
183 independently at the two loci. When the two loci are on the same chromosome,  
184 predicting offspring proportions is more complicated. Now there are not two but  
185 seven distinct genotypic configurations following prophase of meiosis I, with  
186 transitions between these states induced by crossovers between the two loci and  
187 between the loci and their centromere (Figure S1). In the Supplementary Information  
188 (SI, section 1), the expected proportions of these configurations are derived both for  
189 fixed numbers of crossovers and assuming again a Poisson distribution of crossovers.  
190 Table 1 lists the corresponding proportions of genotypic configurations in a dually  
191 heterozygous mother for a number of scenarios of either complete linkage or absence  
192 of linkage. Also shown in Table 1 are the proportions of offspring genotypes resulting  
193 from each genotypic configuration under central fusion, terminal fusion and gamete  
194 duplication automixis. Finally, averaging over all genotypic configurations yields the  
195 total expected offspring distribution under the different automixis and linkage



196 scenarios, as shown again for extreme linkage scenarios and the three modes of  
197 automixis in Table 2.

198 A general result from this analysis is that, as expected, the total fraction of offspring  
199 that become homozygous at each locus is the same as predicted by the single-locus  
200 equations. Thus, in the case of central fusion automixis and denoting by **A** the locus  
201 that is more closely linked to the centromere than the other locus **B**, we have

$$202 \quad \gamma_{\mathbf{A}}^{CF} = \frac{1}{3} \left( 1 - e^{-\frac{3\bar{n}}{2}} \right) \quad \text{and} \quad \gamma_{\mathbf{B}}^{CF} = \frac{1}{3} \left( 1 - e^{-\frac{3(\bar{n}+\bar{m})}{2}} \right), \quad (4)$$

203 where  $\bar{n}$  is the expected number of crossovers between the centromere and locus **A**  
204 and  $\bar{m}$  the expected number of crossovers between loci **A** and **B**. However, the two  
205 rates at which homozygosity is attained are not independent. Instead, since the two  
206 loci are linked, the fraction of offspring that are homozygous at both loci is greater  
207 than what is expected for each locus individually:

$$208 \quad \gamma_{\mathbf{AB}}^{CF} = \frac{1}{3} \left( 1 - e^{-\frac{3\bar{n}}{2}} \right) \times \frac{1}{3} \left( 1 + 2e^{-\frac{3\bar{m}}{2}} \right) > \gamma_{\mathbf{A}}^{CF} \gamma_{\mathbf{B}}^{CF}. \quad (5)$$

209 With terminal fusion, we obtain

$$210 \quad \gamma_{\mathbf{A}}^{TF} = \frac{1}{3} \left( 1 + 2e^{-\frac{3\bar{n}}{2}} \right), \quad \gamma_{\mathbf{B}}^{TF} = \frac{1}{3} \left( 1 + 2e^{-\frac{3(\bar{n}+\bar{m})}{2}} \right), \quad \text{and}$$

$$211 \quad \gamma_{\mathbf{AB}}^{TF} = \frac{1}{3} \left( 1 + 2e^{-\frac{3\bar{n}}{2}} \right) \times \frac{1}{3} \left( 1 + 2e^{-\frac{3\bar{m}}{2}} \right) > \gamma_{\mathbf{A}}^{TF} \gamma_{\mathbf{B}}^{TF}. \quad (6)$$

## 212 **Neutral genetic variation**

213 Let us assume an unstructured, finite population of females reproducing through  
214 automictic parthenogenesis. We consider a single locus at which new genetic variants  
215 that are selectively neutral can arise by mutation at a rate  $\mu$  and we assume that each  
216 mutation produces a new allele (the “infinite alleles-model”). Heterozygosity in  
217 individuals may be lost through automixis (with probability  $\gamma$ ), and genetic variation  
218 can be lost through drift (determined by population size  $N$ ). We are interested in the  
219 equilibrium level of genetic variation that is expected in such a population.

220 A first quantity of interest is the heterozygosity  $H_I$ , i.e. the probability that the two  
 221 alleles in a randomly chosen female are different. Following the standard approach for  
 222 these type of models (e.g., HARTL and CLARK 1997), the change in  $H_I$  from one  
 223 generation to the next can be expressed through the change in homozygosity,  $1 - H_I$ ,  
 224 as

$$225 \quad (1 - H'_I) = (1 - \mu)^2 [1 - (1 - \gamma)H_I]. \quad (7)$$

226 Solving  $H'_I = H_I$  yields the equilibrium heterozygosity

$$227 \quad \hat{H}_I = \frac{1 - (1 - \mu)^2}{1 - (1 - \mu)^2(1 - \gamma)}. \quad (8)$$

228 Second, we can calculate the probability  $H_T$  that two alleles drawn randomly from  
 229 two different females are different (the “population level heterozygosity”). The  
 230 recursion equation for  $H_T$  is given by

$$231 \quad (1 - H'_T) = (1 - \mu)^2 \left[ \frac{1}{N} \left( 1 - \frac{H_I}{2} \right) + \left( 1 - \frac{1}{N} \right) (1 - H_T) \right]. \quad (9)$$

232 After substituting  $\hat{H}_I$  from Eq. (8) for  $H_I$ , the equilibrium is found to be

$$233 \quad \hat{H}_T = 1 - \frac{2\gamma(1 - \mu)^4 + \mu(1 - \mu)^2(2 - \mu)}{2[1 + (N - 1)\mu(2 - \mu)][\gamma(1 - \mu)^2 + \mu(2 - \mu)]}. \quad (10)$$

234 Combined, these two quantities allow us to calculate  $\hat{F}_{IT}$ , the relative difference  
 235 between population-level and individual-level heterozygosity at equilibrium:

$$236 \quad \hat{F}_{IT} = \frac{\hat{H}_T - \hat{H}_I}{\hat{H}_T} = \frac{(2N\gamma - 1)(1 - \mu)^2}{(1 - \mu)^2 + 2N[\gamma(1 - \mu)^2 + \mu(2 - \mu)]}. \quad (11)$$

237 Finally, we can calculate the probability  $\hat{H}_G$  that two randomly drawn individuals  
 238 have a different genotype at the locus under consideration. Unfortunately, this seems  
 239 to require a more elaborate approach than the simple recursion equations used to  
 240 calculate  $\hat{H}_I$  and  $\hat{H}_T$ , which is detailed in the SI (section 2). The resulting formula is  
 241 rather cumbersome and not given here, but we can approximate  $\hat{H}_G$  assuming  $N\gamma \gg 1$   
 242 and  $N\mu \gg 1$ . This yields the (still unwieldy)

$$243 \quad \hat{H}_G \approx 1 - \frac{N^2\gamma^3(2 - \gamma) + 2\mu(1 + 2N\mu)(1 + 3N\mu) + \gamma(1 + 2N\mu)((1 + 5N\mu) + N\gamma^2(3 + 8N\mu))}{(1 + 2N\mu)(\gamma + 2\mu(1 - \gamma))(1 + N(\gamma + 3\mu))(1 + N\gamma(2 - \gamma) + 4N\mu)}. \quad (12)$$

244 Figure 2 shows how the four statistics quantifying different aspects of genetic  
245 diversity depend on the rate  $\gamma$  at which heterozygosity in individuals is eroded, and  
246 compares them to the corresponding statistics in outbreeding sexual populations. Also  
247 shown in Figure 2 are diversity estimates from simulations (see SI, section 3 for  
248 details), indicating that the analytical predictions are very accurate. It can be seen that  
249 both the within-individual and population-level heterozygosities decline with  
250 increasing  $\gamma$ . Also, the former is greater than the latter for small values of  $\gamma$ , resulting  
251 in negative values of  $\hat{F}_{IT}$ , but this pattern reverses for larger  $\gamma$ . In Figure S2, the same  
252 relationships are shown but expressed in terms of map distance for the case of central  
253 fusion automixis (see Eq. 3). These plots illustrate that for the parameters assumed,  
254 large between-locus variation in equilibrium genetic diversity is only expected in the  
255 close vicinity of the centromeres.

256 In order to gain further insight into the formulae derived above, it may be helpful to  
257 consider a few special cases.

258 **Special case 1:  $\gamma = 0$ .** This case corresponds to strict clonal reproduction and has  
259 been studied previously (BALLOUX *et al.* 2003). In line with these previous results, all  
260 individuals are expected to eventually become heterozygous ( $\hat{H}_I = 1$ ), representing an  
261 extreme case of the Meselson effect (NORMARK *et al.* 2003; WELCH and MESELSON  
262 2000). Furthermore, for the equilibrium population-level heterozygosity we get

$$263 \quad \hat{H}_T = 1 - \frac{(1-\mu)^2}{2+2\mu(N-1)(2-\mu)} \approx \frac{1+4N\mu}{2+4N\mu}, \quad (13)$$

264 which is always greater than the corresponding genetic diversity in outbreeding sexual  
265 populations ( $4N\mu/(1+4N\mu)$ , see also Fig. 2B). When  $4N\mu$  is small,  $\hat{H}_T \approx 1/2$ .  $\hat{F}_{IT}$   
266 simplifies to

$$267 \quad \hat{F}_{IT} = -\frac{(1-\mu)^2}{1+\mu(2N-1)(2-\mu)} \approx -\frac{1}{1+4N\mu}. \quad (14)$$

268 This is always negative because all individuals are heterozygous but alleles sampled  
269 from different individuals may still be identical. Finally,

$$270 \quad \hat{H}_G \approx \frac{4N\mu}{1+4N\mu}, \quad (15)$$

271 i.e.  $\hat{H}_G$  is identical to the equilibrium heterozygosity in sexual populations. This is  
272 because with strict clonal reproduction, each mutation gives rise to not only a new  
273 allele but also to a new genotype. New diploid genotypes arise twice as often as new  
274 alleles in sexual populations, but this is exactly offset by twice the number of gene  
275 copies in sexual populations than genotypes in clonal populations.

276 **Special case 2:  $\gamma = 1$  (gamete duplication).** This represents the opposite extreme:  
277 barring new mutations all heterozygosity is immediately lost. Thus,  $\hat{H}_I = \mu(2 - \mu) \approx$   
278 0 and, as a direct consequence,  $\hat{F}_{IT} \approx 1$ . Moreover,

$$279 \quad \hat{H}_T = \frac{\mu(2-\mu)[2N+(1-\mu)^2]}{2+2(N-1)\mu(2-\mu)} \approx \frac{2\mu N}{1+2\mu N} \quad \text{and} \quad \hat{H}_G = \frac{2(N-1)\mu}{1+2(N-1)\mu} \approx \frac{2\mu N}{1+2\mu N}. \quad (16)$$

280 Not surprisingly,  $\hat{H}_T \approx \hat{H}_G$  because when all individuals are homozygous, comparing  
281 sampled alleles from different females and comparing genotype samples is equivalent.  
282 Also,  $\hat{H}_T$  and  $\hat{H}_G$  are always lower than the expected heterozygosity in sexual  
283 populations.

284 **Special case 3:  $N \rightarrow \infty$ .** As the equilibrium heterozygosity is not affected by  
285 population size, equation (8) remains valid for  $\hat{H}_I$ . As expected both  $\hat{H}_T$  and  $\hat{H}_G$   
286 converge to one as  $N$  goes to infinity. Finally,

$$287 \quad \hat{F}_{IT} \rightarrow \frac{\gamma(1-\mu)^2}{1-(1-\mu)^2(1-\gamma)}, \quad (17)$$

288 which is equal to the equilibrium individual-level homozygosity,  $\hat{H}_I$ .

## 289 **Mutation-selection balance**

290 In order to investigate the balance between the creation of deleterious alleles through  
291 mutation and their purging by natural selection in automictic populations, let us

292 assume an infinitely large population and a single locus with two alleles a (wildtype)  
 293 and A (deleterious mutation). Wildtype aa individuals have a fitness of  $w_{aa} = 1$   
 294 relative to heterozygotes with  $w_{Aa} = 1 - hs$  and mutant homozygotes with  
 295  $w_{AA} = 1 - s$ . To keep the model tractable, I assume that the mutation rate  $\mu$  is small  
 296 so that at most one mutation event occurs during reproduction, and that there is no  
 297 back mutation from mutant to wildtype allele. Automixis operates as in the previous  
 298 section, with heterozygotes producing a fraction  $\gamma/2$  of either homozygote. Assuming  
 299 a life-history order of selection-mutation-automixis, the recursion frequencies for the  
 300 two mutant genotypes can be expressed as

$$\begin{aligned}
 301 \quad p'_{Aa} &= \frac{[(1-hs)(1-\mu)p_{Aa} + 2\mu(1-p_{Aa}-p_{AA})](1-\gamma)}{1-hsp_{Aa}-sp_{AA}}, \\
 302 \quad p'_{AA} &= \frac{\mu\gamma(1-p_{Aa}-p_{AA}) + (1-hs)\left(\frac{\gamma}{2} + \mu\left(1-\frac{\gamma}{2}\right)\right)p_{Aa} + p_{AA}(1-s)}{1-hsp_{Aa}-sp_{AA}}. \quad (18)
 \end{aligned}$$

303 Solving  $(p'_{Aa}, p'_{AA}) = (p_{Aa}, p_{AA})$  yields the frequencies of the mutant genotypes under  
 304 mutation-selection equilibrium. Unfortunately, the resulting formulae are rather  
 305 lengthy and uninformative. However, in a few special cases tractable results can be  
 306 obtained.

307 **Special case 1: Clonal reproduction ( $\gamma = 0$ ).** In this case, the equilibrium that will  
 308 be attained depends on the magnitude of the mutation rate. First, when the mutation  
 309 rate is small,  $\mu \leq hs/(1 + hs)$ , we get

$$310 \quad \hat{p}_{Aa} = \frac{2\mu(s-2\mu)}{s[hs+\mu(1-h(2+s))]}, \quad \hat{p}_{AA} = \frac{2\mu^2(1-hs)}{s[hs+\mu(1-h(2+s))]} \quad (19)$$

311 At this equilibrium, the population will consist mostly of mutation-free aa individuals,  
 312 with some heterozygotes and very few AA homozygotes. Second, when  $hs/(1 +$   
 313  $hs) < \mu \leq s/2$ , the equilibrium is given by

$$314 \quad \hat{p}_{Aa} = 1 - \frac{\mu(1-hs)}{(1-h)s}, \quad \hat{p}_{AA} = \frac{\mu(1-hs)}{(1-h)s} \quad (20)$$

315 No mutation-free aa individual persist in the population in this case (since  $\hat{p}_{Aa} +$   
 316  $\hat{p}_{AA} = 1$ ). Intuitively, this situation arises when selection against heterozygotes is so  
 317 weak relative to the mutation rate that eventually all aa individuals are converted into  
 318 heterozygotes and a mutation-selection balance is attained between Aa and AA  
 319 individuals. This balance is then analogous to the standard mutation-selection balance  
 320 in haploid populations. Indeed, after re-normalizing all fitness values with the fitness  
 321 of heterozygotes and defining an adjusted selection coefficient against AA  
 322 homozygotes,  $\tilde{s} = 1 - (1 - s)/(1 - hs)$ , the equilibrium frequency of homozygous  
 323 mutants can be expressed as  $\hat{p}_{AA} = \mu/\tilde{s}$ . Finally, when  $\mu > s/2$ , the mutation pressure  
 324 outweighs selection completely and the mutant homozygotes will become fixed in the  
 325 population ( $\hat{p}_{AA} = 1$ ).

326 **Special case 2: Gamete duplication ( $\gamma = 1$ ).** At the opposite extreme, when all  
 327 heterozygotes are immediately converted into homozygotes, the equilibrium  
 328 frequencies are given by

$$329 \quad \hat{p}_{Aa} = 0, \quad \hat{p}_{AA} = \frac{\mu}{s}. \quad (21)$$

330 It is clear that in this case, selection against heterozygotes and thus the dominance  
 331 coefficient  $h$  is irrelevant. Mutation-free aa homozygotes produce heterozygote  
 332 mutant offspring at a rate  $2\mu$  per generation, but these heterozygotes are immediately  
 333 converted into aa and AA offspring, each with probability 1/2. Thus, the effective rate  
 334 at which AA offspring are produced is  $\mu$  and the attained mutation-selection balance  
 335 is identical to the one attained in haploid populations.

336 **Special case 3: Recessive deleterious mutations ( $h = 0$ ).** With arbitrary values of  $\gamma$   
 337 but strictly recessive deleterious mutations, the equilibrium is given by

$$338 \quad \hat{p}_{Aa} = \frac{2\mu(s-\mu)(1-\gamma)}{s[\gamma+\mu(2-3\gamma)]}, \quad \hat{p}_{AA} = \frac{\mu}{s}. \quad (22)$$

339 Thus, the equilibrium frequency  $\hat{p}_{AA}$  of mutant homozygotes is identical to the one  
340 expected in sexual populations with recessive deleterious mutations (corresponding to  
341 an equilibrium allele frequency of  $\hat{p}_A = \sqrt{\mu/s}$ ). The equilibrium frequency of  
342 heterozygotes is a decreasing function of  $\gamma$  and can be either higher or lower than the  
343 corresponding equilibrium frequency of heterozygotes in sexual populations.

344 Figure 3 shows equilibrium frequencies of the Aa and AA genotypes under mutation-  
345 selection balance for recessive, partially recessive, semidominant and dominant  
346 mutations and compares these frequencies to the corresponding frequencies in sexual  
347 populations. For  $\gamma > 0$ , the frequency of heterozygotes is generally lower than in  
348 sexual populations whereas the frequency of AA homozygotes is higher than in sexual  
349 populations. Related to this, the equilibrium frequencies in automictic populations are  
350 generally much less sensitive to the dominance coefficient  $h$  than in sexual  
351 populations because  $\gamma > 0$  implies that selection against heterozygotes is much less  
352 important than in sexual populations.

353 The equilibrium frequencies can also be used to calculate the mutational load  $L_{mut}$ ,  
354 i.e. the relative reduction in the mean fitness of the population caused by recurrent  
355 mutation. This quantity can be expressed as  $L_{mut} = 1 - \bar{w} = hs\hat{p}_{Aa} + s\hat{p}_{AA}$ . From  
356 this and Eqs. (20) and (21) it can be deduced that both with gamete duplication ( $\gamma =$   
357 1) and recessive mutations ( $h = 0$ ), the genetic load in the population is given by the  
358 mutation rate  $\mu$ , the same as for recessive mutations in sexual diploid populations and  
359 also the same as in haploid populations. In general,  $L_{mut}$  will be greater than  $\mu$ , but,  
360 always slower than  $2\mu$  and, interestingly, often lower than the genetic load in sexual  
361 populations (Figure S3). This is in contrast to previous theoretical studies on the  
362 mutational load in clonal diploids in which the maintenance of heterozygosity caused  
363 the asexual populations to accumulate a higher load than the sexual populations  
364 (CHASNOV 2000; HAAG and ROZE 2007). It is important to note however that the

365 simple results derived here do not account for finite population size and interference  
 366 between multiple loci, which may have a strong impact on mutation-selection balance  
 367 and the mutational load (GLEMIN 2003; HAAG and ROZE 2007; ROZE 2015).

### 368 **Overdominance**

369 When there is overdominance (i.e., a heterozygote fitness advantage over the  
 370 homozygote genotypes), it is useful to parameterize the fitness values as  $w_{aa} = 1 -$   
 371  $s_{aa}$ ,  $w_{Aa} = 1$  and  $w_{AA} = 1 - s_{AA}$ , with  $0 < s_{aa}, s_{AA} \leq 1$ . The recursion equation for  
 372 the genotype frequencies  $p_{Aa}$  and  $p_{AA}$  can then be expressed as

$$373 \quad p'_{Aa} = \frac{(1-\gamma)p_{Aa}}{1-(1-p_{AA}-p_{Aa})s_{aa}-p_{AA}s_{AA}}, \quad p'_{AA} = \frac{(1-s_{AA})p_{AA}+p_{Aa}\gamma/2}{1-(1-p_{AA}-p_{Aa})s_{aa}-p_{AA}s_{AA}}. \quad (23)$$

374 Solving  $(p'_{Aa}, p'_{AA}) = (p_{Aa}, p_{AA})$  yields the following polymorphic equilibrium:

$$375 \quad \hat{p}_{Aa} = \frac{2(s_{aa}-\gamma)(s_{AA}-\gamma)}{2s_{aa}s_{AA}-\gamma(s_{aa}+s_{AA})}, \quad \hat{p}_{AA} = \frac{\gamma(s_{aa}-\gamma)}{2s_{aa}s_{AA}-\gamma(s_{aa}+s_{AA})}. \quad (24)$$

376 This equilibrium takes positive values for  $\gamma < s_{aa}$  and  $\gamma < s_{AA}$ , and stability analysis  
 377 indicates that this is also the condition for the equilibrium to be stable. (The  
 378 eigenvalues of the associated Jacobian matrix are  $(1 - s_{aa})/(1 - \gamma)$  and  $(1 -$   
 379  $s_{AA})/(1 - \gamma)$ .) Thus, overdominant selection can maintain heterozygotes in the face  
 380 of erosion by automixis if the selection coefficient against either of the homozygotes  
 381 is greater than the rate at which heterozygosity is lost. This result has previously been  
 382 conjectured by Goudie *et al.* (2012) on the basis of numerical results of a similar  
 383 model, and more complex expressions for equilibrium (24) have been derived by  
 384 Asher (1970).

385 Depending on  $\gamma$ , the equilibrium frequency of heterozygotes can take any value  
 386 between 0 (when  $\gamma \geq \min \{s_{aa}, s_{AA}\}$ ) and 1 (when  $\gamma = 0$ , i.e. with clonal  
 387 reproduction). This is shown in Figure 4 and contrasted with the equilibrium  
 388 frequency in sexual populations, given by  $2s_{aa}s_{AA}/(s_{aa} + s_{AA})^2$ .



389 We can also calculate how much the mean fitness in the population at equilibrium is  
390 reduced by automixis compared to clonal reproduction. Provided that  $\gamma < s_{aa}, s_{AA}$ ,  
391 this “automixis load” is given by

$$392 \quad L_{\text{automixis}} = (1 - \hat{p}_{AA} - \hat{p}_{Aa})s_{aa} - \hat{p}_{AA}s_{AA} = \gamma. \quad (25)$$

393 This simple formula parallels the classic result that the mutational load in haploid  
394 populations is given by the mutation rate and thus shows that automixis acts like  
395 mutation in producing two genotypes (AA and aa) of inferior fitness from the fittest  
396 genotype (Aa) that are then purged by natural selection. The genetic load can be either  
397 smaller or greater than the corresponding segregation load in a sexual population.  
398 More precisely, when  $\gamma < L_{\text{seg}} = s_{aa}s_{AA}/(s_{aa} + s_{AA})$  (CROW and KIMURA 1970),  
399 there will be more heterozygotes in the automictic population and their genetic load  
400 will be lower than in the sexual population, and *vice versa*. When  $\gamma > \min\{s_{aa}, s_{AA}\}$ ,  
401 the heterozygotes are lost from the population and either the aa (if  $s_{aa} < s_{AA}$ ) or the  
402 AA genotype (if  $s_{aa} > s_{AA}$ ) will become fixed. In this case, we obtain the largest  
403 possible load,  $L_{\text{automixis}} = \min\{s_{aa}, s_{AA}\}$ .

#### 404 **Associative overdominance**

405 In addition to overdominance, heterozygosity could also be maintained through off-  
406 phase recessive deleterious mutations at tightly linked loci (FRYDENBERG 1963; OHTA  
407 1971), and this has been proposed to explain heterozygosity in the Cape honeybee  
408 (GOUDIE *et al.* 2014). Consider a recently arisen lineage reproducing through central  
409 fusion automixis in which by chance, the founding female carries a strongly  
410 deleterious recessive mutation *A* on one chromosome and another strongly deleterious  
411 recessive mutation *B* at a tightly linked locus on the homologous chromosome. Thus,  
412 the genetic constitution of this female is *Aabb*. Then, the vast majority of offspring  
413 that have become homozygous for the high-fitness allele *a* are also homozygous for

414 the deleterious allele  $B$  and *vice versa*, so that linkage produces strong indirect  
415 selection against both  $aa$  and  $bb$  homozygotes.

416 In order to explore this mechanism, numerical explorations of a two-locus model of  
417 an infinitely large population undergoing selection and reproduction through  
418 automixis were performed. This model builds upon the expressions for loss of  
419 heterozygosity in the presence of recombination between a centromer and two loci  
420 derived above (for details see SI section 4). Heterozygosity at either locus entails a  
421 reduction of fitness of  $1 - h_i s_i$  ( $i \in \{A, B\}$ ) whereas homozygosity for the deleterious  
422 alleles reduces fitness by  $1 - s_i$  in each locus. Fitness effects at the two loci are  
423 multiplicative (i.e., no epistasis). An example run is shown in Figure 5A. As can be  
424 seen, the  $AabB$  genotype is maintained at a high frequency for a considerable number  
425 of generations (in automixis-selection balance with the two homozygous genotypes  
426  $AAbb$  and  $aaBB$ ) before it is eroded by recombination between the two loci and the  
427  $aabb$  genotype spreads to fixation. We can also treat the two linked loci as a single  
428 locus and use the equilibrium frequency of heterozygotes derived above for single-  
429 locus overdominance to estimate the quasi-stable frequency of the  $AabB$  genotype  
430 before it is dissolved. Specifically, this frequency can be approximated by Eq. (24)  
431 following substitution of  $s_{AA}$  for  $s_B$ ,  $s_{aa}$  for  $s_A$ , and  $\gamma$  for the expression in Eq. (3),  
432 yielding

$$433 \quad p_{AabB} \approx \frac{2(1+3s_A - \exp(-3\bar{n}/2))(1+3s_B - \exp(-3\bar{n}/2))}{18s_A s_B + 3(s_A + s_B)(1 - \exp(-3\bar{n}/2))} \quad (26)$$

434 For simplicity, this approximation assumes complete recessivity ( $h_A = h_B = 0$ ), but  
435 partial recessivity could also readily be incorporated. As shown in Fig. 5A, this  
436 approximation is very close to the quasi-stable frequency of the  $AabB$  genotype  
437 obtained numerically.

438 Next, we can ask for how long the  $AabB$  genotype is expected to persist in the  
439 population. To address this question, screens of the parameter space with respect to

440 the two mean crossover numbers were performed. The recursion equations were  
 441 initiated with only *AabB* individuals present in the population and iterated until their  
 442 frequency dropped below 0.01. The number of generations this took for different  
 443 mean numbers of crossovers  $\bar{n}$  between locus **A** and the centromere and different  
 444 numbers of crossovers  $\bar{m}$  between loci **A** and **B** are shown in Figure 5B. It can be  
 445 seen that provided that the two loci are both tightly linked to the centromer, central  
 446 fusion automixis can indeed maintain the polymorphism for many generations. The  
 447 same principle also applies to terminal fusion automixis and sexual reproduction, but  
 448 here the deleterious recessive mutations are only maintained for very short time  
 449 periods (results not shown).

#### 450 **Spread of beneficial mutations**

451 In order to better understand adaptive evolution in automictic populations, consider  
 452 first a deterministic single locus model without mutation and with relative fitness  
 453  $1 + hs$  and  $1 + s$  for heterozygotes and *AA* homozygotes, respectively. The recursion  
 454 equations for this model can then be written as

$$455 \quad p'_{Aa} = \frac{(1+hs)(1-\gamma)p_{Aa}}{1+p_{Aa}hs+p_{AA}s}, \quad p'_{AA} = \frac{(1+hs)\gamma p_{Aa}/2+(1+s)p_{AA}}{1+p_{Aa}hs+p_{AA}s}. \quad (27)$$

456 Assuming that both the *Aa* and the *AA* genotype are rare in the population and that  $s$  is  
 457 small, these recursion equations can be approximated by

$$458 \quad p'_{Aa} \approx (1 + hs)(1 - \gamma)p_{Aa}, \quad p'_{AA} = \frac{1}{2}(1 + hs)\gamma p_{Aa} + (1 + s)p_{AA}. \quad (28)$$

459 This system of recursion equations can be solved, and if we further assume that  
 460 initially there are only one or few heterozygote mutants but no *AA* homozygotes  
 461 ( $p_{AA}(0) = 0$ ), this solution becomes

$$462 \quad p_{Aa}(t) = p_{Aa}(0)\kappa^t \quad \text{and} \quad p_{AA}(t) = p_{Aa}(0) \frac{(1+hs)\gamma[(1+s)^t - \kappa^t]}{2(1+s-\kappa)}, \quad (29)$$

463 with  $\kappa := (1 + hs)(1 - \gamma)$ . These expressions demonstrate that when  $\gamma$  is large  
 464 relative to the selection benefit of heterozygotes – more precisely when  $\kappa < 1$ , or

465  $\gamma > \frac{hs}{1+hs} \approx hs$  – the heterozygotes will not be maintained and the beneficial mutation  
466 will instead spread as a homozygous genotype through the population. Thus, in this  
467 case we have for sufficiently large  $t$ :

$$468 \quad p_{Aa}(t) \approx 0 \quad \text{and} \quad p_{AA}(t) \approx p_{Aa}(0) \frac{(1+hs)\gamma}{2(1+s-\kappa)} (1+s)^t. \quad (30)$$

469 Here,  $h$  and  $\gamma$  determine how efficiently the initial heterozygotes are maintained and  
470 converted to homozygotes, but only  $s$  determines the actual rate at which the  
471 beneficial mutation spreads. By comparison, a beneficial mutation in an outbreeding  
472 sexual population will initially be found in heterozygotes only, with

$$473 \quad p_{Aa}(t) \approx p_{Aa}(0)(1+hs)^t. \quad (31)$$

474 Thus, the rate at which the mutation spreads in sexual populations is determined by  
475 the fitness advantage in heterozygotes only, which means the mutation will always  
476 spread at a lower rate than in automictic populations. Nevertheless, the heterozygotes  
477 in sexual populations have a ‘head start’ relative to the homozygotes in automictic  
478 populations (see fraction in Eq. 30), which results from the fact that only half of the  
479 original heterozygotes are converted into homozygotes. This means with high  
480 dominance levels  $h$ , it might still take some time until a beneficial allele reaches a  
481 higher frequency in an automictic compared to a sexual population.

482 When  $0 < \gamma < \frac{hs}{1+hs} \approx hs$ , both heterozygotes and AA homozygotes will spread  
483 simultaneously in the population and, for very small  $\gamma$ , it may take a long time until  
484 the homozygotes reach a higher frequency than the heterozygotes. In the extreme case  
485 of  $\gamma = 0$  (clonal reproduction), heterozygote frequency increases by a factor of  
486  $(1+hs)$  in each generation (i.e., at the same rate as in outbreeding sexuals) and no  
487 homozygotes are produced.

488 These considerations clearly show that unless beneficial mutations are completely  
489 dominant, they will spread faster in automictic than in either clonal or sexual

490 populations. To what extent does this result hold when more than one locus is  
491 considered? It is well known that asexually reproducing populations may fix  
492 beneficial mutations more slowly because of clonal interference, i.e. competition  
493 between simultaneously spreading beneficial mutations that in the absence of  
494 recombination cannot be brought together into the same genome (FISHER 1930;  
495 MULLER 1932). Despite the term “clonal interference”, this mechanism should also  
496 operate in automictic populations, and we can ask whether and under what conditions  
497 the decelerating effect of clonal interference on the speed of adaptive evolution can  
498 offset the beneficial effects of turning heterozygous with one beneficial into  
499 homozygotes with two beneficial mutations.

500 To address this question, numerical investigations of a two-locus model involving  
501 recombination, automixis, selection and drift were performed. (Note that clonal  
502 interference only operates in finite populations subject to random genetic drift and/or  
503 random mutations; full details of this model can be found in the SI, section 5.) The  
504 results of a screen of the two crossover rates  $\bar{n}$  (between locus **A** and the centromere)  
505 and crossovers  $\bar{m}$  between (between loci **A** and **B**) are shown in Fig. 6. It appears that  
506 unless  $\bar{n}$  is very small, recessive beneficial mutations spread considerably faster in  
507 automictic than in sexual populations, despite clonal interference in the former. With  
508 additive fitness effects, the difference between automictic and sexual populations is  
509 less pronounced and the beneficial effects of recombination become apparent when  $\bar{n}$   
510 is very small. Perhaps surprisingly, the mean number  $\bar{m}$  of crossover between the two  
511 loci under selection, which determines the recombination rate in the sexual  
512 population, plays only a minor role and needs to take low values for recessive  
513 beneficial mutations to spread slightly faster in sexual than automictic populations  
514 (bottom-left corner in Fig. 6A). This is because although increasing values of  $\bar{m}$  lead

515 to faster spread of the beneficial mutations in sexual populations, this effect is only  
516 weak compared to the accelerating effect of increasing  $\bar{m}$  in automictic populations.

### 517 **Selection on crossover rates**

518 We finally turn to the question of whether natural selection is expected to reduce  
519 crossover rates in automictic populations. Let us first consider a population  
520 reproducing by central fusion automixis in which heterozygosity at a given locus is  
521 maintained through overdominant selection. Combining the results from Eq. (3) and  
522 (25), the mean fitness of a resident population with a mean crossover number  $\bar{n}$  is  
523 given by

$$524 \quad \bar{w} = 1 - \gamma = \frac{1}{3} \left( 2 + \exp \left( -\frac{3\bar{n}}{2} \right) \right). \quad (32)$$

525 Since reproduction is asexual and assuming a dominant crossover modifier allele, the  
526 selection coefficient  $\sigma$  for a mutant genotype with a different crossover rate can be  
527 obtained simply by comparing mean fitness of the resident and the mutant lineage.  
528 (This is in contrast to recombination rate evolution in sexual populations, where a  
529 much more sophisticated approach is required (BARTON 1995).) If the factor by which  
530 crossover numbers are altered is denoted by  $\alpha$  (i.e., the mutant mean number of  
531 crossovers is  $\alpha\bar{n}$ ), this yields

$$532 \quad \sigma = \frac{\exp\left(-\frac{3\alpha\bar{n}}{2}\right) - \exp\left(-\frac{3\bar{n}}{2}\right)}{2 + \exp\left(-\frac{3\bar{n}}{2}\right)} \approx \frac{1}{2} (1 - \alpha)\bar{n}, \quad (33)$$

533 where the approximation is valid for small  $\bar{n}$ . As expected, any mutant in which  
534 crossover rates are suppressed ( $\alpha < 1$ ) is selectively favoured ( $\sigma > 0$ ). In the extreme  
535 case of  $\alpha = 0$  (complete crossover suppression),

$$536 \quad \sigma = \frac{1 - \exp\left(-\frac{3\bar{n}}{2}\right)}{2 + \exp\left(-\frac{3\bar{n}}{2}\right)}, \quad (34)$$

537 which ranges from around  $\bar{n}/2$  when the initial crossover rate is already very small to  
538  $1/2$  when  $\bar{n}$  is very large.

539 With terminal fusion automixis, we obtain

$$540 \quad \sigma = \frac{e^{-\frac{3\bar{n}}{2}} - e^{-\frac{3\alpha\bar{n}}{2}}}{1 - e^{-\frac{3\bar{n}}{2}}} \approx \alpha - 1. \quad (35)$$

541 Again, the approximation is valid for small  $\bar{n}$  (but note that conditions where  
542 overdominance stably maintains heterozygosity are rather limited in this case; see Eq.  
543 (24)). Increases in crossover rates are selected for with terminal fusion, but even when  
544 there are many crossovers between the focal locus and its centromere, a substantial  
545 genetic load ( $L = 1/3$ ) will persist.

546 We can also ask how selection should operate on crossover rates in automictic  
547 populations evolving under mutation-selection balance. Without answering this  
548 question in any quantitative detail, we can note that since the equilibrium genetic load  
549 decreases with increasing  $\gamma$  (Fig. S3), there should be selection for increased  
550 crossover rates in populations with central fusion automixis and selection for  
551 decreased recombination rates in populations with terminal fusion automixis.  
552 However, given that genetic load is always in the range between  $\mu$  and  $2\mu$ , selection  
553 for increased crossovers will be only very weak on a per-locus basis ( $\sigma < \mu$ ).

554 Preliminary numerical investigations competing two lineages with different crossover  
555 rates confirm the predictions on selection on crossover rates. However, it will be  
556 important to study this problem more thoroughly in a multi-locus model and with  
557 finite populations so that for example also the impact of stochastically arising  
558 associative overdominance can be ascertained.

559

## 560 **Discussion**

### 561 **Automixis as a viable system of reproduction?**

562 Automixis is a peculiar mode of reproduction. Not only are, as with other modes of  
563 asexual reproduction, the benefits of recombination forfeited, but the fusion of  
564 meiotic products to restore diploidy also means that heterozygosity can be lost at a  
565 high rate. This raises intriguing questions as to why automixis has evolved numerous  
566 times and how stably automictically reproducing populations can persist. Previous  
567 work has shown that the loss of complementation faced by a newly evolved  
568 automictically reproducing female can cause severe reductions in fitness that may  
569 exceed the twofold cost of sex and are likely to severely constrain the rate at which  
570 sex is abandoned (ARCHETTI 2004; ARCHETTI 2010; ENGELSTÄDTER 2008). However,  
571 the results obtained here indicate that once an automictic population is established, it  
572 may persist and in some respects even be superior to clonal or sexual populations. In  
573 particular, neutral genetic diversity will be lower in automictic than in clonal  
574 populations but may still be greater than in sexual populations, the mutational load  
575 will generally be lower in automictic than in both sexual and clonal populations  
576 (unless mutations are completely recessive), and the genetic load caused by  
577 overdominant selection can be lower in automictic than in sexual populations.

578 Empirical examples confirming that automicts can be highly successful at least on  
579 short to intermediate timescales include the Cape honeybee “Clone” (which has been  
580 spreading for more than 25 years) (GOUDIE and OLDROYD 2014), the invasive ant  
581 *Cerapachys biroi* (which has been reproducing asexually for at least 200 generations)  
582 (OXLEY *et al.* 2014; WETTERER *et al.* 2012), and *Muscidifurax uniraptor* wasps which  
583 have been infected by parthenogenesis-inducing *Wolbachia* for long enough that male  
584 functions have degenerated (GOTTLIEB and ZCHORI-FEIN 2001). Of course, automictic



585 populations still suffer from the lack of recombination and hence long-term  
586 consequences such as the accumulation of deleterious mutations through Muller's  
587 ratchet or reduced rates of adaptation because of clonal interference. It therefore does  
588 not come as a surprise that like other asexuals, automictic species tend to be  
589 phylogenetically isolated (SCHWANDER and CRESPI 2009). One exception to this rule  
590 are the oribatid mites, in which around 10% out of >10,000 species reproduce by  
591 automixis and radiations of automictic species have occurred (DOMES *et al.* 2007;  
592 HEETHOFF *et al.* 2009). In order to better understand the long-term dynamics of  
593 adaptation and mutation accumulation in automictic populations, it would be useful to  
594 develop more sophisticated models than presented here that incorporate multiple loci  
595 and random genetic drift.

#### 596 **Relationship to other genetic systems**

597 There is a bewildering diversity of genetic systems that have similarities to automixis.  
598 In order to discuss the relationship of the results obtained here with prior work it may  
599 be useful to group these genetic systems into two classes. The first are systems that  
600 are mechanistically distinct from automixis but are genetically equivalent. This  
601 includes systems in animals and plants where there is no fusion of meiotic products  
602 but some other meiotic modification that has the same consequences, and also  
603 systems of intratetrad mating. The results obtained here are thus directly applicable  
604 and previous theoretical work on such systems can directly be compared to the work  
605 presented here. For example, parthenogenesis in *Daphnia pulex* has been reported to  
606 proceed through a modified meiosis in which the first anaphase is aborted halfway,  
607 homologous chromosomes are re-joined and the second meiotic division proceeds  
608 normally (HIRUTA *et al.* 2010). Similarly, some forms of apomixis in plants (meiotic  
609 diplospory) are also achieved by suppression of the first meiotic division  
610 (GUSTAFFSON 1931; VAN DIJK 2009). These modifications of meiosis are genetically

611 equivalent to central fusion automixis and can, through complete suppression of  
612 recombination, also lead to clonal reproduction. Intratetrad mating is commonly found  
613 in many fungi, algae and other organisms and is achieved through a variety of  
614 mechanisms (HOOD and ANTONOVICS 2004; KERRIGAN *et al.* 1993). Provided the  
615 mating-type locus is completely linked to the centromere, intra-tetrad mating is  
616 genetically equivalent to central fusion automixis (ANTONOVICS and ABRAMS 2004).  
617 If the mating-type locus is not closely linked to the centromere, the outcome would  
618 still be equivalent to automixis but with a mixture of terminal and central fusion,  
619 depending on whether or not there has been a recombination event between the  
620 mating-type locus and the centromere.

621 The second class of systems comprises those that are very similar to automixis but  
622 equivalent only when a single locus is considered. This means that many of the results  
623 reported here (e.g., on neutral variation, mutation-selection balance and  
624 overdominance) can still be applied. For example, clonal populations in which there is  
625 occasional, symmetrical gene conversion can be considered genetically equivalent to  
626 the single-locus models considered here, with the rate of loss of heterozygosity  $\gamma$   
627 replaced by the gene conversion rate. Gene conversion has been reported in several  
628 parthenogenetic animals (CREASE and LYNCH 1991; FLOT *et al.* 2013; SCHON and  
629 MARTENS 2003), and recently a number of results concerning coalescent times and  
630 patterns have been derived for such systems (HARTFIELD *et al.* 2016). Populations that  
631 reproduce exclusively by selfing also belong into this class; such populations are  
632 characterized by a rate of heterozygosity loss of  $\gamma = 1/2$ . It should be emphasized,  
633 however, that selfing in general is rather distinct even from random automixis: in  
634 essence, the difference is that alleles are sampled either with (selfing) or without  
635 (automixis) replacement from the meiotic products.

## 636 **Populations with mixed automictic and sexual reproduction**

637 The models presented here assume populations that reproduce exclusively through  
638 automixis. Although several species with exclusively automictic reproduction have  
639 been reported, many other species exhibit different forms of mixed sexual and  
640 automictic reproduction. The simplest case is one where a lineage of automicts  
641 competes with sexual conspecifics but where there is no gene flow between these two  
642 populations. Such a situation is found in the Cape honeybee, *Apis mellifera capensis*,  
643 in which a subpopulation (the “Clone”) reproduces through central fusion automixis  
644 and parasitizes colonies of a sexual subspecies, *A. mellifera scutellata* (GOUDIE and  
645 OLDROYD 2014). In principle, the results presented here could be used to predict the  
646 outcome of such competitions by comparing population mean fitness of sexual and  
647 automictic populations. However, the case of the Cape honeybee is fraught with a  
648 number of additional complexities, including both honeybee characteristics such as  
649 eusociality and the complementary sex determination system, and the parasitic nature  
650 and the epidemiological dynamics of the Clone. This will make it necessary to  
651 develop specifically tailored models that incorporate both the evolutionary genetics  
652 consequences of automixis explored in the present paper and the ecological and  
653 genetic idiosyncrasies of the Clone (MARTIN *et al.* 2002; MORITZ 2002).

654 More complicated is the case of gene flow between the sexual and automictic  
655 subpopulations. This can occur for example when otherwise automictic females  
656 occasionally produce males. Provided these males are viable and fertile, they may  
657 mate and produce offspring with the sexual females. This will not only introduce  
658 genetic material from the asexual into the sexual populations, but it may also lead to  
659 the emergence new automictic lineages because the males may transmit the genes  
660 coding for automictic reproduction to their female offspring. Such cases of  
661 ‘contagious parthenogenesis’ (SIMON *et al.* 2003) associated with automixis have

662 been reported in the parasitoid wasp *Lysiphlebus fabarum* (SANDROCK *et al.* 2011;  
663 SANDROCK and VORBURGER 2011) and *Artemia* brine shrimps (MACCARI *et al.* 2014).  
664 Some aspects of the evolutionary dynamics of such systems have been studied  
665 (ENGELSTÄDTER *et al.* 2011), but population genetic processes such as the ones  
666 studied here remain to be investigated.

667 Finally, there are many species in which there are no clear sexual and asexual  
668 subpopulations but where females can reproduce both sexually and through  
669 automixis. This includes for example the majority of *Drososophila* species where  
670 parthenogenesis has been reported (MARKOW 2013), and also a number of vertebrates  
671 with facultative parthenogenesis (LAMPERT 2008). It is expected that sexual  
672 populations capable of occasional automictic reproduction should not differ much  
673 from sexual populations in terms of population genetic processes. One exception is  
674 that rare automixis may facilitate the colonization of previously uninhabited areas.  
675 Distinguishing the genomic signature of the resulting automictically arisen population  
676 bottlenecks from those of ‘conventional’ bottlenecks will be challenging but may be  
677 feasible with data on genome-wide levels of heterozygosity (see also SVENDSEN *et al.*  
678 2015). On the other hand, rare sex in predominantly automictic populations is  
679 expected to have a great impact as the mixing of lineages may efficiently counteract  
680 clonal interference and Muller’s ratchet (HOJSGAARD and HORANDL 2015).

## 681 **Conclusions**

682 In this study, a number of theoretical results regarding basic on the population  
683 genetics of automictic populations were derived both for neutral and selective  
684 processes. A general conclusion that emerges is that in analogy to strong levels of  
685 inbreeding, automictic reproduction is difficult to evolve but once established may be  
686 viable on intermediate timescales and even has advantages compared to clonal and  
687 sexual reproduction. Future theoretical work is still necessary to elucidate long-term

688 evolutionary patterns of automictic species such as the rate of mutational meltdown  
689 under Muller's ratchet or the dynamics of adaptation.

## 690 **Acknowledgments**

691 I thank Christoph R. Haag and Nicholas M. A. Smith for their insightful comments on  
692 the manuscript. I would also like to thank the Instituto Gulbenkian Ciência (Portugal)  
693 for hosting me during the final stages of preparing this manuscript.

694

## 695 **References**

- 696 ALLSOPP, M., 1992 The Capensis calamity. *South African Bee Journal* **64**: 52-55.
- 697 ANTONOVICS, J., and J. Y. ABRAMS, 2004 Intratetrad mating and the evolution of  
698 linkage relationships. *Evolution* **58**: 702-709.
- 699 ARCHETTI, M., 2004 Recombination and loss of complementation: a more than two-  
700 fold cost for parthenogenesis. *Journal of Evolutionary Biology* **17**: 1084-1097.
- 701 ARCHETTI, M., 2010 Complementation, Genetic Conflict, and the Evolution of Sex  
702 and Recombination. *Journal of Heredity* **101**: S21-S33.
- 703 ASHER, J. H., JR., 1970 Parthenogenesis and genetic variability. II. One-locus models  
704 for various diploid populations. *Genetics* **66**: 369-391.
- 705 ASKER, S. E., and L. JERLING, 1992 *Apomixis in plants*. CRC Press, Boca Raton.
- 706 BALLOUX, F., L. LEHMANN and T. DE MEEUS, 2003 The population genetics of clonal  
707 and partially clonal diploids. *Genetics* **164**: 1635-1644.
- 708 BARTON, N. H., 1995 A general model for the evolution of recombination. *Genetical*  
709 *Research* **65**: 123-144.
- 710 BAUDRY, E., P. KRYGER, M. ALLSOPP, N. KOENIGER, D. VAUTRIN *et al.*, 2004 Whole-  
711 genome scan in thelytokous-laying workers of the cape honeybee (*Apis*  
712 *mellifera capensis*): Central fusion, reduced recombination rates and  
713 centromere mapping using half-tetrad analysis. *Genetics* **167**: 243-252.
- 714 BELL, G., 1982 *The Masterpiece of Nature: The Evolution and Genetics of Sexuality*.  
715 Croom Helm, London.
- 716 BELSHAW, R., and D. L. J. QUICKE, 2003 The cytogenetics of thelytoky in a  
717 predominantly asexual parasitoid wasp with covert sex. *Genome* **46**: 170-173.
- 718 BEUKEBOOM, L. W., and L. P. PIJNACKER, 2000 Automictic parthenogenesis in the  
719 parasitoid *Venturia canescens* (Hymenoptera: Ichneumonidae) revisited.  
720 *Genome* **43**: 939-944.

- 721 CHASNOV, J. R., 2000 Mutation-selection balance, dominance and the maintenance of  
722 sex. *Genetics* **156**: 1419-1425.
- 723 CREASE, T. J., and M. LYNCH, 1991 Ribosomal DNA Variation in *Daphnia-Pulex*.  
724 *Molecular Biology and Evolution* **8**: 620-640.
- 725 CROW, J. F., and M. KIMURA, 1970 *An introduction to population genetics theory*.  
726 Harper & Row, New York,.
- 727 DOMES, K., R. A. NORTON, M. MARAUN and S. SCHEU, 2007 Reevolution of sexuality  
728 breaks Dollo's law. *Proceedings of the National Academy of Sciences of the*  
729 *United States of America* **104**: 7139-7144.
- 730 ENGELSTÄDTER, J., 2008 Constraints on the evolution of asexual reproduction.  
731 *BioEssays* **30**: 1138-1150.
- 732 ENGELSTÄDTER, J., C. SANDROCK and C. VORBURGER, 2011 Contagious  
733 Parthenogenesis, Automixis, and a Sex Determination Meltdown. *Evolution*  
734 **65**: 501-511.
- 735 FISHER, R. A., 1930 *The Genetical Theory of Natural Selection*. Oxford University  
736 Press, Oxford.
- 737 FLOT, J. F., B. HESPEELS, X. LI, B. NOEL, I. ARKHIPOVA *et al.*, 2013 Genomic  
738 evidence for ameiotic evolution in the bdelloid rotifer *Adineta vaga*. *Nature*  
739 **500**: 453-457.
- 740 FRYDENBERG, O., 1963 Population Studies of a Lethal Mutant in *Drosophila*  
741 *Melanogaster* .1. Behaviour in Populations with Discrete Generations.  
742 *Hereditas* **50**: 89-&.
- 743 GLEMIN, S., 2003 How are deleterious mutations purged? Drift versus nonrandom  
744 mating. *Evolution* **57**: 2678-2687.

- 745 GOTTlieb, Y., and E. ZCHORI-FEIN, 2001 Irreversible thelytokous reproduction in  
746 *Muscidifurax uniraptor*. *Entomologia Experimentalis et Applicata* **100**: 271-  
747 278.
- 748 GOTTlieb, Y., E. ZCHORI-FEIN, J. H. WERREN and T. L. KARR, 2002 Diploidy  
749 restoration in *Wolbachia* -infected *Muscidifurax uniraptor* (Hymenoptera:  
750 Pteromalidae). *Journal of Invertebrate Pathology* **81**: 166-174.
- 751 GOUDIE, F., M. H. ALLSOPP, M. BEEKMAN, P. R. OXLEY, J. LIM *et al.*, 2012  
752 Maintenance and loss of heterozygosity in a thelytokous lineage of honey bees  
753 (*Apis mellifera capensis*). *Evolution* **66**: 1897-1906.
- 754 GOUDIE, F., M. H. ALLSOPP and B. P. OLDROYD, 2014 Selection on overdominant  
755 genes maintains heterozygosity along multiple chromosomes in a clonal  
756 lineage of honey bee. *Evolution* **68**: 125-136.
- 757 GOUDIE, F., and B. P. OLDROYD, 2014 Thelytoky in the honey bee. *Apidologie* **45**:  
758 306-326.
- 759 GUSTAFFSON, Å., 1931 Die Formenbildung der Totalapomikten. *Hereditas* **18**: 259–  
760 283.
- 761 HAAG, C. R., and D. ROZE, 2007 Genetic load in sexual and asexual diploids:  
762 segregation, dominance and genetic drift. *Genetics* **176**: 1663-1678.
- 763 HARTFIELD, M., S. I. WRIGHT and A. F. AGRAWAL, 2016 Coalescent Times and  
764 Patterns of Genetic Diversity in Species with Facultative Sex: Effects of Gene  
765 Conversion, Population Structure, and Heterogeneity. *Genetics* **202**: 297-312.
- 766 HARTL, D. L., and A. G. CLARK, 1997 *Principles of population genetics*. Sinauer  
767 Associates, Inc., Sunderland, Massachusetts
- 768 HEETHOFF, M., R. A. NORTON, S. SCHEU and M. MARAUN, 2009 Parthenogenesis in  
769 Oribatid Mites (Acari, Oribatida): Evolution Without Sex. *Lost Sex: The*  
770 *Evolutionary Biology of Parthenogenesis*: 241-257.



- 771 HIRUTA, C., C. NISHIDA and S. TOCHINAI, 2010 Abortive meiosis in the oogenesis of  
772 parthenogenetic *Daphnia pulex*. *Chromosome Research* **18**: 833-840.
- 773 HOJSGAARD, D., and E. HORANDL, 2015 A little bit of sex matters for genome  
774 evolution in asexual plants. *Front Plant Sci* **6**: 82.
- 775 HOOD, M. E., and J. ANTONOVICS, 2004 Mating within the meiotic tetrad and the  
776 maintenance of genomic heterozygosity. *Genetics* **166**: 1751-1759.
- 777 KERRIGAN, R. W., J. C. ROYER, L. M. BALLER, Y. KOHLI, P. A. HORGAN *et al.*, 1993  
778 Meiotic Behavior and Linkage Relationships in the Secondarily Homopthalic  
779 Fungus *Agaricus-Bisporus*. *Genetics* **133**: 225-236.
- 780 LAMPERT, K. P., 2008 Facultative Parthenogenesis in Vertebrates: Reproductive Error  
781 or Chance? *Sexual Development* **2**: 290-301.
- 782 MACCARI, M., F. AMAT, F. HONTORIA and A. GOMEZ, 2014 Laboratory generation of  
783 new parthenogenetic lineages supports contagious parthenogenesis in *Artemia*.  
784 *PeerJ* **2**: e439.
- 785 MARKOW, T. A., 2013 Parents Without Partners: *Drosophila* as a Model for  
786 Understanding the Mechanisms and Evolution of Parthenogenesis. *G3-Genes*  
787 *Genomes Genetics* **3**: 757-762.
- 788 MARTIN, S., T. WOSSLER and P. KRYGER, 2002 Usurpation of African *Apis mellifera*  
789 *scutellata* colonies by parasitic *Apis mellifera capensis* workers. *Apidologie*  
790 **33**: 215-231.
- 791 MATSUURA, K., M. FUJIMOTO and K. GOKA, 2004 Sexual and asexual colony  
792 foundation and the mechanism of facultative parthenogenesis in the termite  
793 *Reticulitermes speratus* (Isoptera, Rhinotermitidae). *Insectes Sociaux* **51**: 325-  
794 332.

- 795 MORITZ, R. F. A., 2002 Population dynamics of the Cape bee phenomenon: The  
796 impact of parasitic laying worker clones in apiaries and natural populations.  
797 *Apidologie* **33**: 233-244.
- 798 MORITZ, R. F. A., and M. HABERL, 1994 Lack of Meiotic Recombination in  
799 Thelytokous Parthenogenesis of Laying Workers of *Apis-Mellifera-Capensis*  
800 (the Cape Honeybee). *Heredity* **73**: 98-102.
- 801 MULLER, H. J., 1932 Some genetic aspects of sex. *American Naturalist* **66**: 118-138.
- 802 MURDY, W. H., and H. L. CARSON, 1959 Parthenogenesis in *Drosophila mangabeirai*  
803 *Malog*. *American Naturalist* **93**: 355-363.
- 804 NORMARK, B. B., O. P. JUDSON and N. A. MORAN, 2003 Genomic signatures of  
805 ancient asexual lineages. *Biological Journal of the Linnean Society* **79**: 69-84.
- 806 NOUGUE, O., N. O. RODE, R. JABBOUR-ZAHAB, A. SEGARD, L. M. CHEVIN *et al.*, 2015  
807 Automixis in *Artemia*: solving a century-old controversy. *J Evol Biol* **28**:  
808 2337-2348.
- 809 OHTA, T., 1971 Associative Overdominance Caused by Linked Detrimental  
810 Mutations. *Genetical Research* **18**: 277-&.
- 811 OLDROYD, B. P., M. H. ALLSOPP, J. LIM and M. BEEKMAN, 2011 A Thelytokous  
812 Lineage of Socially Parasitic Honey Bees Has Retained Heterozygosity  
813 Despite at Least 10 Years of Inbreeding. *Evolution* **65**: 860-868.
- 814 OXLEY, P. R., L. JI, I. FETTER-PRUNEDA, S. K. MCKENZIE, C. LI *et al.*, 2014 The  
815 Genome of the Clonal Raider Ant *Cerapachys biroi*. *Current Biology* **24**: 451-  
816 458.
- 817 PANNEBAKKER, B. A., L. P. PIJNACKER, B. J. ZWAAN and L. W. BEUKEBOOM, 2004  
818 Cytology of *Wolbachia*-induced parthenogenesis in *Leptopilina clavipes*  
819 (Hymenoptera : Figitidae). *Genome* **47**: 299-303.

- 820 PEARCY, M., O. HARDY and S. ARON, 2006 Thelytokous parthenogenesis and its  
821 consequences on inbreeding in an ant. *Heredity (Edinb)* **96**: 377-382.
- 822 PEARCY, M., O. J. HARDY and S. ARON, 2011 Automictic parthenogenesis and rate of  
823 transition to homozygosity. *Heredity (Edinb)* **107**: 187-188.
- 824 RABELING, C., and D. J. C. KRONAUER, 2013 Thelytokous Parthenogenesis in  
825 Eusocial Hymenoptera. *Annual Review of Entomology, Vol 58* **58**: 273-+.
- 826 ROZE, D., 2015 Effects of Interference Between Selected Loci on the Mutation Load,  
827 Inbreeding Depression, and Heterosis. *Genetics* **201**: 745-+.
- 828 SANDROCK, C., B. E. SCHIRRMEISTER and C. VORBURGER, 2011 Evolution of  
829 reproductive mode variation and host associations in a sexual-asexual complex  
830 of aphid parasitoids. *BMC Evolutionary Biology* **11**.
- 831 SANDROCK, C., and C. VORBURGER, 2011 Single-Locus Recessive Inheritance of  
832 Asexual Reproduction in a Parasitoid Wasp. *Current Biology* **21**: 433-437.
- 833 SCHON, I., and K. MARTENS, 2003 No slave to sex. *Proceedings of the Royal Society*  
834 *B-Biological Sciences* **270**: 827-833.
- 835 SCHWANDER, T., and B. J. CRESPI, 2009 Twigs on the tree of life? Neutral and  
836 selective models for integrating macroevolutionary patterns with  
837 microevolutionary processes in the analysis of asexuality. *Molecular Ecology*  
838 **18**: 28-42.
- 839 SEILER, J., 1960 Untersuchungen Uber Die Entstehung Der Parthenogenese Bei  
840 *Solenobia Triquetrella* Fr (Lepidoptera, Psychidae) .2. Analyse Der Diploid  
841 Parthenogenetischen *S-Triquetrella* - Verhalten, Aufzuchtresultate Und  
842 Zytologie. *Chromosoma* **11**: 29-&.
- 843 SEKINE, K., and K. TOJO, 2010 Automictic parthenogenesis of a geographically  
844 parthenogenetic mayfly, *Ephoron shigae* (Insecta: Ephemeroptera,  
845 *Polymitarcyidae*). *Biological Journal of the Linnean Society* **99**: 335-343.

- 846 SIMON, J. C., F. DELMOTTE, C. RISPE and T. CREASE, 2003 Phylogenetic relationships  
847 between parthenogens and their sexual relatives: the possible routes to  
848 parthenogenesis in animals. *Biological Journal of the Linnean Society* **79**:  
849 151-163.
- 850 STALKER, H. D., 1954 Parthenogenesis in *Drosophila*. *Genetics* **39**: 4-34.
- 851 STALKER, H. D., 1956 On the Evolution of Parthenogenesis in Lonchoptera (Diptera).  
852 *Evolution* **10**: 345-359.
- 853 STENBERG, P., and A. SAURA, 2009 Cytology of Asexual Animals, pp. 63-74 in *Lost*  
854 *Sex - The Evolutionary Biology of Parthenogenesis*, edited by I. SCHÖN, K.  
855 MARTENS and P. VAN DIJK. Springer, Dordrecht.
- 856 STOUTHAMER, R., and D. J. KAZMER, 1994 Cytogenetics of microbe-associated  
857 parthenogenesis and its consequences for gene flow in *Trichogramma* wasps.  
858 *Heredity* **73**: 317-327.
- 859 SUOMALAINEN, E., A. SAURA and J. LOKKI, 1987 *Cytology and Evolution in*  
860 *Parthenogenesis*. CRC Press, Boca Raton, Florida.
- 861 SVENDSEN, N., C. M. REISSER, M. DUKIC, V. THUILLIER, A. SEGARD *et al.*, 2015  
862 Uncovering Cryptic Asexuality in *Daphnia magna* by RAD Sequencing.  
863 *Genetics* **201**: 1143-1155.
- 864 VAN DER BEEK, J. G., J. A. LOSS and L. P. PIJNACKER, 1998 Cytology of  
865 parthenogenesis of five Meloidogyne species. *Fundamental and Applied*  
866 *Nematology* **21**: 393-399.
- 867 VAN DIJK, P., 2009 Apomixis: Basics for Non-botanists, pp. 47-62 in *Lost Sex - The*  
868 *Evolutionary Biology of Parthenogenesis*, edited by I. SCHÖN, K. MARTENS  
869 and P. VAN DIJK. Springer, Dordrecht.

- 870 VERMA, S., and F. RUTTNER, 1983 Cytological analysis of the thelytokous  
871 parthenogenesis in the Cape honeybee (*Apis mellifera capensis* Escholtz).  
872 *Apidologie* **14**: 41-57.
- 873 WELCH, D. M., and M. MESELSON, 2000 Evidence for the evolution of bdelloid  
874 rotifers without sexual reproduction or genetic exchange. *Science* **288**: 1211-  
875 1215.
- 876 WETTERER, J. K., D. J. C. KRONAUER and M. L. BOROWIEC, 2012 Worldwide spread  
877 of *Cerapachys biroi* (Hymenoptera: Formicidae: Cerapachyinae).  
878 *Myrmecological News* **17**: 1-4.
- 879 WRENSCH, D. L., J. B. KETHLEY and R. A. NORTON, 1994 Cytogenetics of holokinetic  
880 chromosomes and inverted meiosis: keys to the evolutionary success of mites,  
881 with generalizations on eukaryotes, pp. 282–343 in *Mites: Ecological and*  
882 *Evolutionary analyses of life-history pattern*, edited by M. A. HOUCK.  
883 Chapman and Hall, New York.
- 884
- 885
- 886

887 Table 1: Postmeiotic genotype configurations and offspring genotypes arising from an *AaBb* mother.

| Configurations after meiosis | Probability of obtaining a configuration under different assumptions about linkage* |                                                |                                                |                                                               |                                      | Resulting offspring genotypes with different mechanisms of automixis |                    |                                           |
|------------------------------|-------------------------------------------------------------------------------------|------------------------------------------------|------------------------------------------------|---------------------------------------------------------------|--------------------------------------|----------------------------------------------------------------------|--------------------|-------------------------------------------|
|                              | $\bar{n} = 0,$<br>$\bar{m} = 0$                                                     | $\bar{n} = 0,$<br>$\bar{m} \rightarrow \infty$ | $\bar{n} \rightarrow \infty,$<br>$\bar{m} = 0$ | $\bar{n} \rightarrow \infty,$<br>$\bar{m} \rightarrow \infty$ | $\bar{n}_1 = 0,$<br>$\bar{n}_2 = 0,$ | Central fusion                                                       | Terminal fusion    | Gamete duplication                        |
| 1) AB-AB ab-ab               | 1                                                                                   | 1/6                                            | 1/3                                            | 1/18                                                          | 1/2                                  | Only AaBb                                                            | 1/2 AABB, 1/2 aabb | 1/2 AABB, 1/2 aabb                        |
| 2) Ab-Ab aB-aB               | 0                                                                                   | 1/6                                            | 0                                              | 1/18                                                          | 1/2                                  | Only AabB                                                            | 1/2 AAbb, 1/2 aaBB | 1/2 AAbb, 1/2 aaBB                        |
| 3) AB-Ab aB-ab               | 0                                                                                   | 2/3                                            | 0                                              | 2/9                                                           | 0                                    | 1/4 Aabb, 1/4 AaBb,<br>1/4 AabB, 1/4 AaBB                            | 1/2 AABb, 1/2 aaBb | 1/4 AABB, 1/4 AAbb,<br>1/4 aaBB, 1/4 aabb |
| 4) AB-aB Ab-ab               | 0                                                                                   | 0                                              | 0                                              | 2/9                                                           | 0                                    | 1/4 AABb, 1/4 AaBb,<br>1/4 Aabb, 1/4 aaBb                            | 1/2 AaBB, 1/2 Aabb | 1/4 AABB, 1/4 AAbb,<br>1/4 aaBB, 1/4 aabb |
| 5) AB-ab AB-ab               | 0                                                                                   | 0                                              | 2/3                                            | 1/9                                                           | 0                                    | 1/4 AABB, 1/2 AaBb,<br>1/4 aabb                                      | Only AaBb          | 1/2 AABB, 1/2 aabb                        |
| 6) AB-ab Ab-aB               | 0                                                                                   | 0                                              | 0                                              | 2/9                                                           | 0                                    | 1/4 AABb, 1/4 AaBB,<br>1/4 Aabb, 1/4 aaBb                            | 1/2 AaBb, 1/2 AabB | 1/4 AABB, 1/4 AAbb,<br>1/4 aaBB, 1/4 aabb |
| 7) Ab-aB Ab-aB               | 0                                                                                   | 0                                              | 0                                              | 1/9                                                           | 0                                    | 1/4 AAbb, 1/2 AabB,<br>1/4 aaBB                                      | Only AabB          | 1/2 AAbb, 1/2 aaBB                        |

888 \*  $\bar{n}_1 = \bar{n}_2 = 0$  refers to the case where **A** and **B** are on different chromosomes but each is tightly linked to their centromere. In all other cases the two loci are on the same  
889 chromosome.  $\bar{n}$  or  $\bar{m} \rightarrow \infty$  indicates absence of linkage.

890 Table 2: Total offspring distributions produced by AaBb mother.\*

|                    |                                                          | AABB | AABb | AAbb | AaBB | AaBb | AabB | Aabb | aaBB | aaBb | aabb |
|--------------------|----------------------------------------------------------|------|------|------|------|------|------|------|------|------|------|
| Central fusion     | $\bar{n} = 0, \bar{m} = 0$                               | 0    | 0    | 0    | 0    | 1    | 0    | 0    | 0    | 0    | 0    |
|                    | $\bar{n} = 0, \bar{m} \rightarrow \infty$                | 0    | 0    | 0    | 1/6  | 1/3  | 1/3  | 1/6  | 0    | 0    | 0    |
|                    | $\bar{n} \rightarrow \infty, \bar{m} = 0$                | 1/6  | 0    | 0    | 0    | 2/3  | 0    | 0    | 0    | 0    | 1/6  |
|                    | $\bar{n} \rightarrow \infty, \bar{m} \rightarrow \infty$ | 1/36 | 1/9  | 1/36 | 1/9  | 2/9  | 2/9  | 1/9  | 1/36 | 1/9  | 1/36 |
|                    | $\bar{n}_1 = 0, \bar{n}_2 = 0$                           | 0    | 0    | 0    | 0    | 1/2  | 1/2  | 0    | 0    | 0    | 0    |
| Terminal fusion    | $\bar{n} = 0, \bar{m} = 0$                               | 1/2  | 0    | 0    | 0    | 0    | 0    | 0    | 0    | 0    | 1/2  |
|                    | $\bar{n} = 0, \bar{m} \rightarrow \infty$                | 1/12 | 1/3  | 1/12 | 0    | 0    | 0    | 0    | 1/12 | 1/3  | 1/12 |
|                    | $\bar{n} \rightarrow \infty, \bar{m} = 0$                | 1/6  | 0    | 0    | 0    | 2/3  | 0    | 0    | 0    | 0    | 1/6  |
|                    | $\bar{n} \rightarrow \infty, \bar{m} \rightarrow \infty$ | 1/36 | 1/9  | 1/36 | 1/9  | 2/9  | 2/9  | 1/9  | 1/36 | 1/9  | 1/36 |
|                    | $\bar{n}_1 = 0, \bar{n}_2 = 0$                           | 1/4  | 0    | 1/4  | 0    | 0    | 0    | 0    | 1/4  | 0    | 1/4  |
| Gamete duplication | $\bar{n} = 0, \bar{m} = 0$                               | 1/2  | 0    | 0    | 0    | 0    | 0    | 0    | 0    | 0    | 1/2  |
|                    | $\bar{n} = 0, \bar{m} \rightarrow \infty$                | 1/4  | 0    | 1/4  | 0    | 0    | 0    | 0    | 1/4  | 0    | 1/4  |
|                    | $\bar{n} \rightarrow \infty, \bar{m} = 0$                | 1/2  | 0    | 0    | 0    | 0    | 0    | 0    | 0    | 0    | 1/2  |
|                    | $\bar{n} \rightarrow \infty, \bar{m} \rightarrow \infty$ | 1/4  | 0    | 1/4  | 0    | 0    | 0    | 0    | 1/4  | 0    | 1/4  |
|                    | $\bar{n}_1 = 0, \bar{n}_2 = 0$                           | 1/4  | 0    | 1/4  | 0    | 0    | 0    | 0    | 1/4  | 0    | 1/4  |

891 \*  $\bar{n}_1 = \bar{n}_2 = 0$  refers to the case where **A** and **B** are on different chromosomes but each is tightly linked to their centromere.  
 892 In all other cases the two loci are on the same chromosome.  $\bar{n}$  or  $\bar{m} \rightarrow \infty$  indicates absence of linkage.

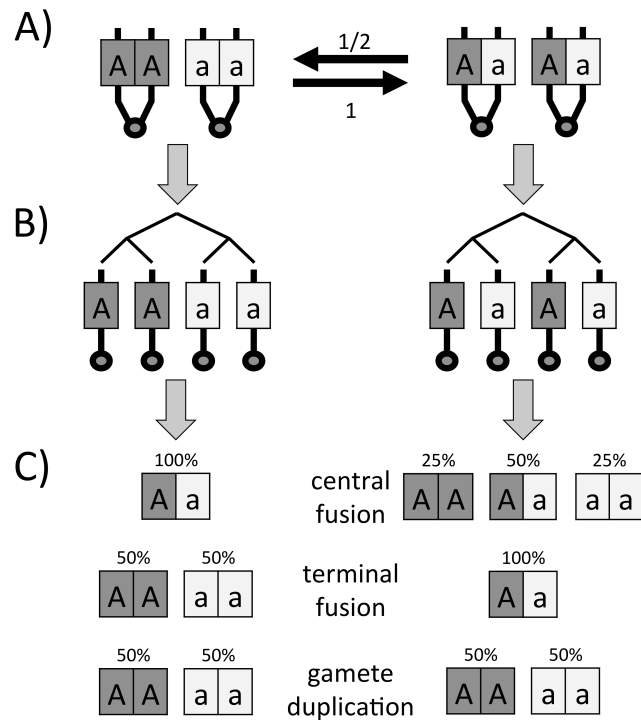

893

894 Figure 1. Illustration of the genetic consequences of automixis at a single locus. A)

895 Starting from a heterozygous mother, during Prophase I, crossover events between the

896 locus can induce switches between two possible states. Each crossover converts the

897 original state where identical alleles are linked to the same centromere to the opposite

898 state where different alleles are linked to one centromere. With probability  $\frac{1}{2}$ ,

899 crossovers can then revert the second to the first state. B) Depending on which state is

900 reached, meiosis will result in one of two possible genetic configurations. C) Fusion

901 of meiotic products or suppression of the first mitotic division can then lead to

902 different proportions of zygote genotypes.

903



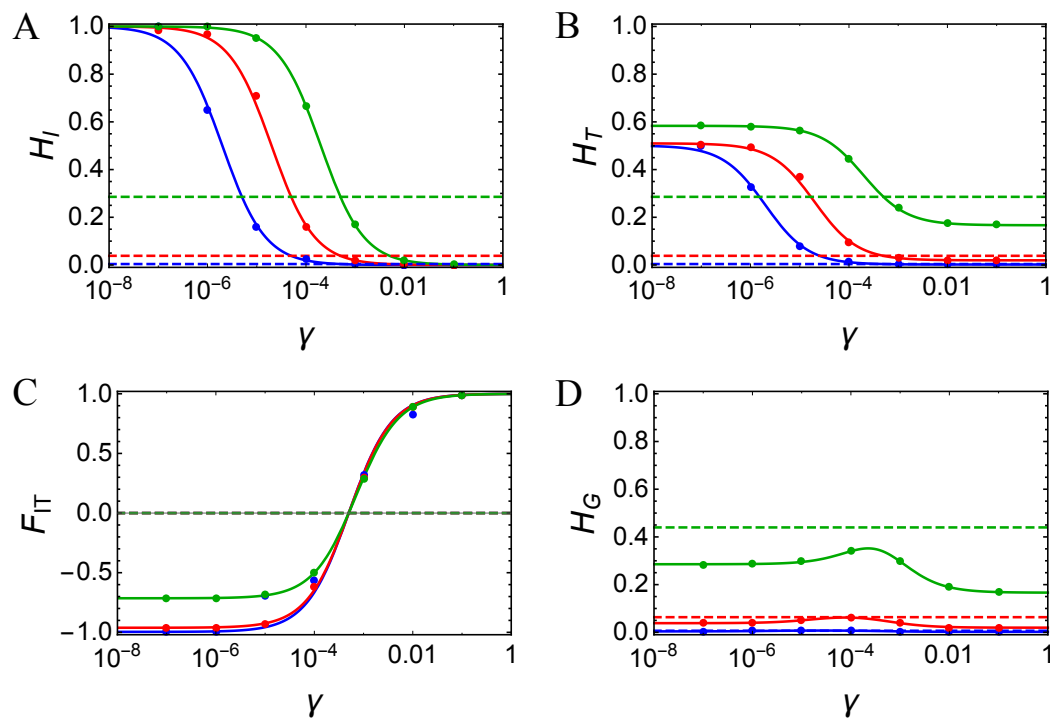

904

905 Figure 2. Equilibrium genetic diversity in neutrally evolving automictic populations,

906 measured as A) within-individual heterozygosity  $\hat{H}_I$ , B) population-level

907 heterozygosity  $\hat{H}_T$ , C) relative reduction in heterozygosity  $\hat{F}_{IT}$ , and D) diploid

908 genotype-level diversity  $\hat{H}_G$ . The solid lines in each plot show the analytical

909 predictions for these statistics for varying rates  $\gamma$  at which heterozygosity is lost in the

910 population, and for three mutation rates:  $10^{-7}$  (blue),  $10^{-6}$  (red) and  $10^{-5}$  (green).

911 Circles show the corresponding estimates from the simulations, and dashed lines show

912 the corresponding expected values in outbreeding, sexual populations. Throughout,

913 the population size was fixed to  $N = 1000$ . Note that most of the range of values for  $\gamma$

914 shown are relevant only for central fusion automixis ( $0 \leq \gamma \leq 1/3$ ), whilst

915 predictions for terminal fusion and gamete duplications are restricted to the rightmost

916 part of the plots ( $1/3 \leq \gamma \leq 1$  and  $\gamma = 1$ , respectively).

917

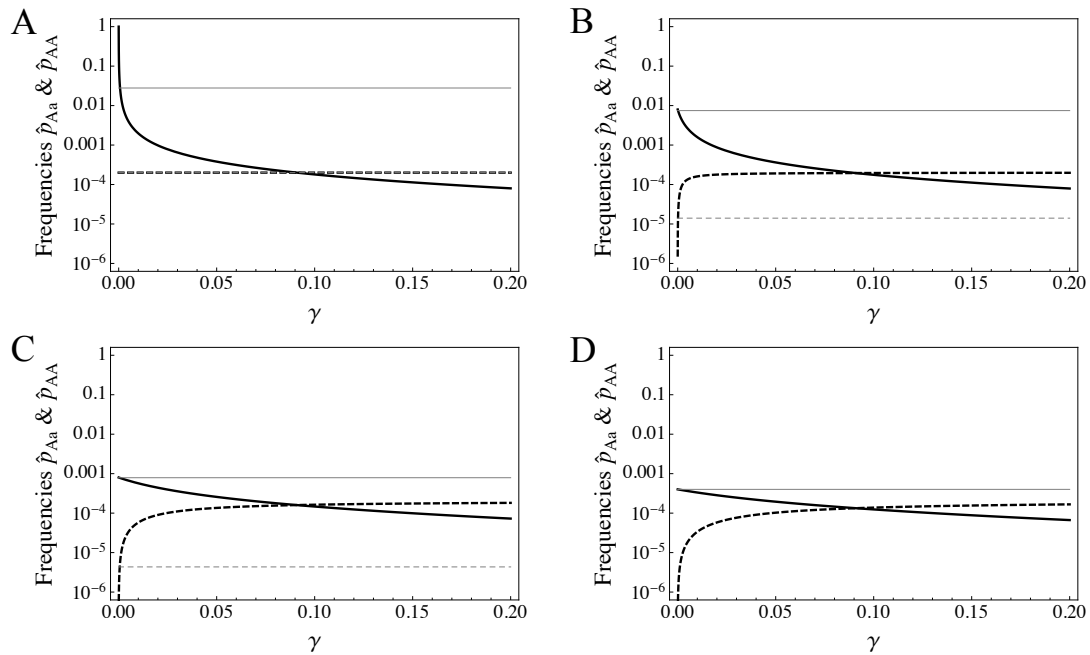

918

919 Figure 3. Equilibrium genotype frequencies under mutation-selection balance with  
920 different homozygosity acquisition rates  $\gamma$ , and for mutations that are A) recessive  
921 ( $h = 0$ ), B) partially recessive ( $h = 0.05$ ), C) semidominant ( $h = 0.5$ ), and D)  
922 dominant mutations ( $h = 1$ ). In each plot, the bold solid line gives the equilibrium  
923 frequency of  $Aa$  heterozygotes and the bold dashed line the equilibrium frequency of  
924  $AA$  homozygotes. For comparison, the thin lines show the corresponding frequencies  
925 in outbreeding sexual populations. Other parameters take the values  $s = 0.05$  and  
926  $\mu = 10^{-5}$ .

927

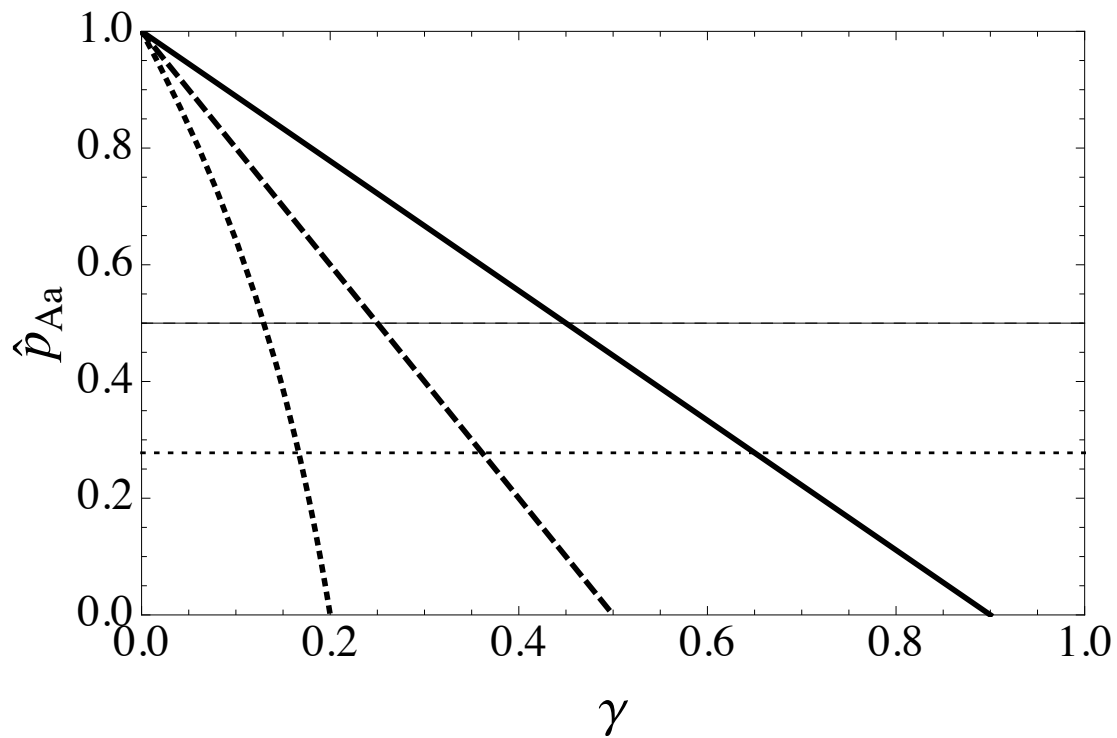

928

929 Figure 4. Equilibrium heterozygote frequencies under overdominant selection and for  
930 given rates  $\gamma$  at which heterozygotes are converted into homozygotes. The bold lines  
931 show these frequencies under automictic reproduction and for  $s_{AA} = s_{aa} = 0.9$  (solid  
932 line),  $s_{AA} = s_{aa} = 0.5$  (dashed line), and  $s_{AA} = 1$ ,  $s_{aa} = 0.2$  (dotted line). For  
933 comparison, the thin lines show the corresponding frequencies in outbreeding sexual  
934 populations.

935

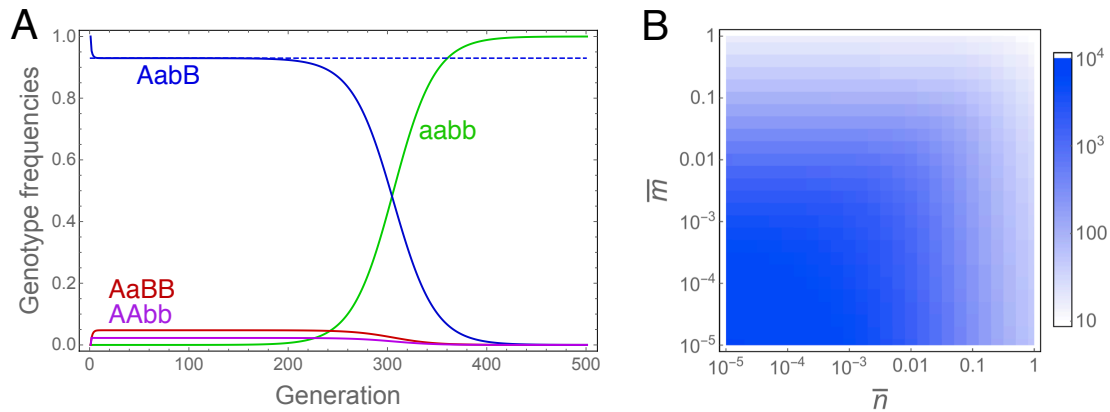

936

937 Figure 5. Maintenance of strongly deleterious mutations (A and B) in an *AabB*

938 genotype through associative overdominance with central fusion automixis. A)

939 Example evolutionary dynamics where solid lines show the four predominant

940 genotypes in the population and the dashed blue line gives the approximation for the

941 quasi-stable frequency of the *AabB* genotype. Parameters take the values  $s_A = 0.999$ ,

942  $s_B = 0.5$ ,  $h_A = h_B = 0$ ,  $\bar{n} = 0.1$  and  $\bar{m} = 10^{-7}$ . B) Time until dissolution of the

943 *AabB* genotype for different mean crossover numbers  $\bar{n}$  (between centromer and

944 locus A) and  $\bar{m}$  (between loci A and B). Values shown are the number of generations

945 until the frequency of the *AabB* genotype has dropped from 1 to 0.01 in the

946 population. Other parameters take the values  $s_A = s_B = 0.99$  and  $h_A = h_B = 0.001$ .

947

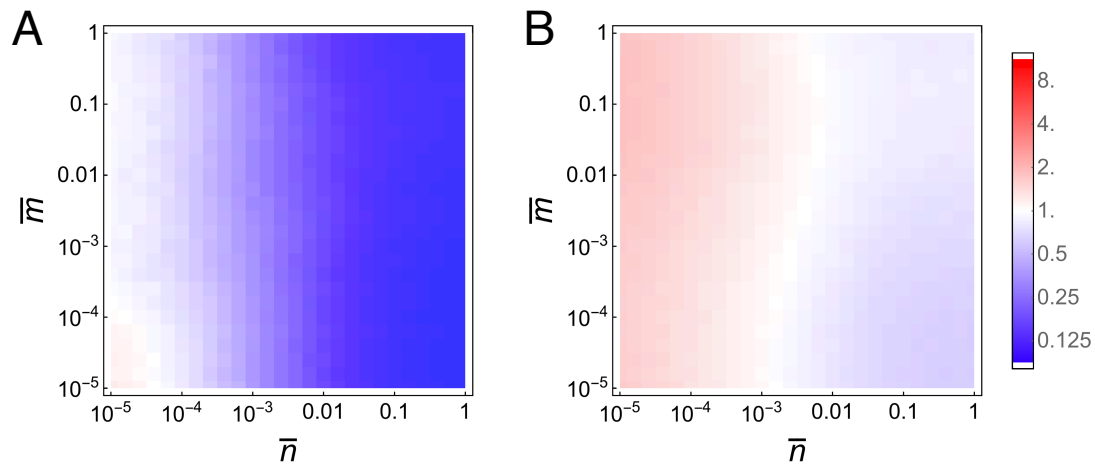

948

949 Figure 6. Number of generations required for the spread of two beneficial mutations  
950 in populations reproducing through central fusion automixis relative to sexual  
951 populations. Each plot shows these relative times for different mean crossover  
952 numbers  $\bar{n}$  (between the centromere and locus **A**) and  $\bar{m}$  (between loci **A** and **B**). Blue  
953 color (relative times  $< 1$ ) indicates that the spread of the beneficial mutations was  
954 faster in the autotictic than in the sexual populations, and red color (relative times  
955  $> 1$ ) indicates the opposite. Each simulation was initialized with a population of non-  
956 adapted *aabb* genotypes. Beneficial mutations *A* and *B* could then arise at a rate  
957  $\mu = 10^{-5}$  and were assumed to provide a fitness benefit of  $s_A = s_B = 0.1$ , with  
958 dominance coefficient **A**)  $h_A = h_B = 0.01$  (recessive beneficial mutations) or **B**)  
959  $h_A = h_B = 0.5$  (additive effects). Populations were subject to random genetic drift  
960 with population size  $N=10,000$  and results were averaged over 1000 replicate  
961 simulations. Spread of the beneficial mutations was considered complete when the  
962 mean population fitness had increased by more than 99% of the maximum possible  
963 increase.

964

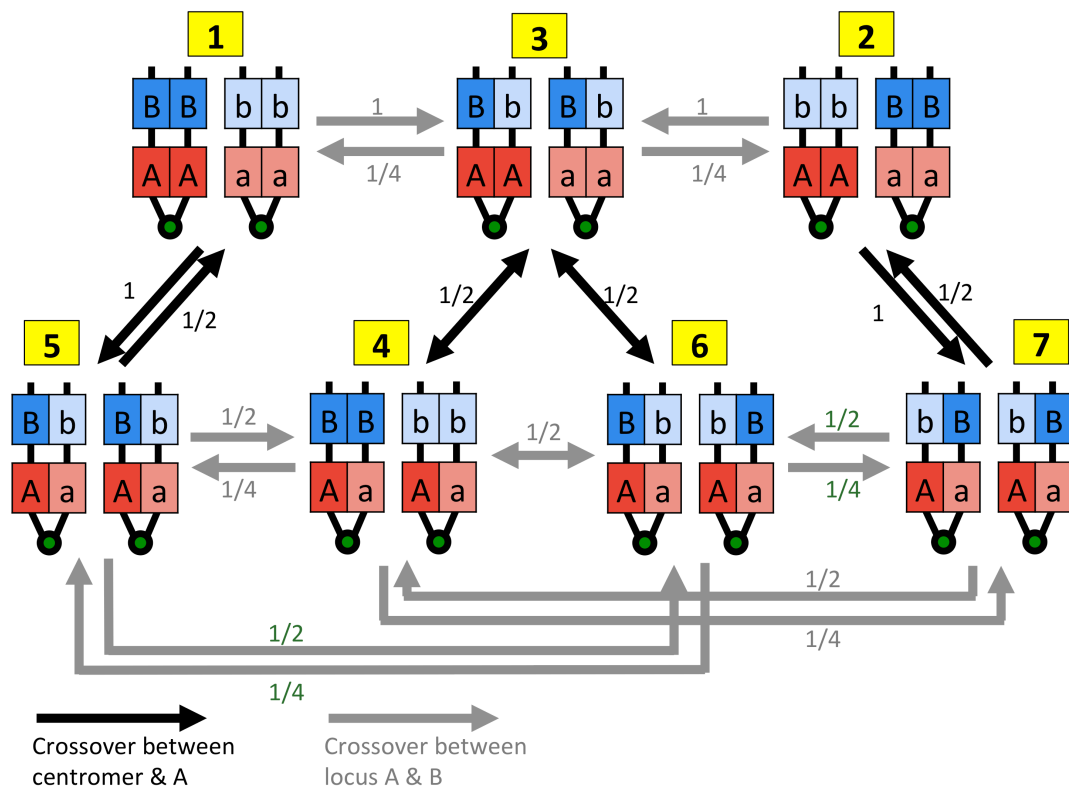

965

966 Figure S1. Illustration of the seven possible genotypic states with two linked loci  
 967 following meiotic prophase I, and how crossovers between the two loci (grey) or  
 968 between the locus A and the centromere (black) effect transitions between these  
 969 states. Numbers next to the arrows indicate probabilities and the numbering of the  
 970 states (yellow boxes) corresponds to the states as defined in the SI, section 1.

971

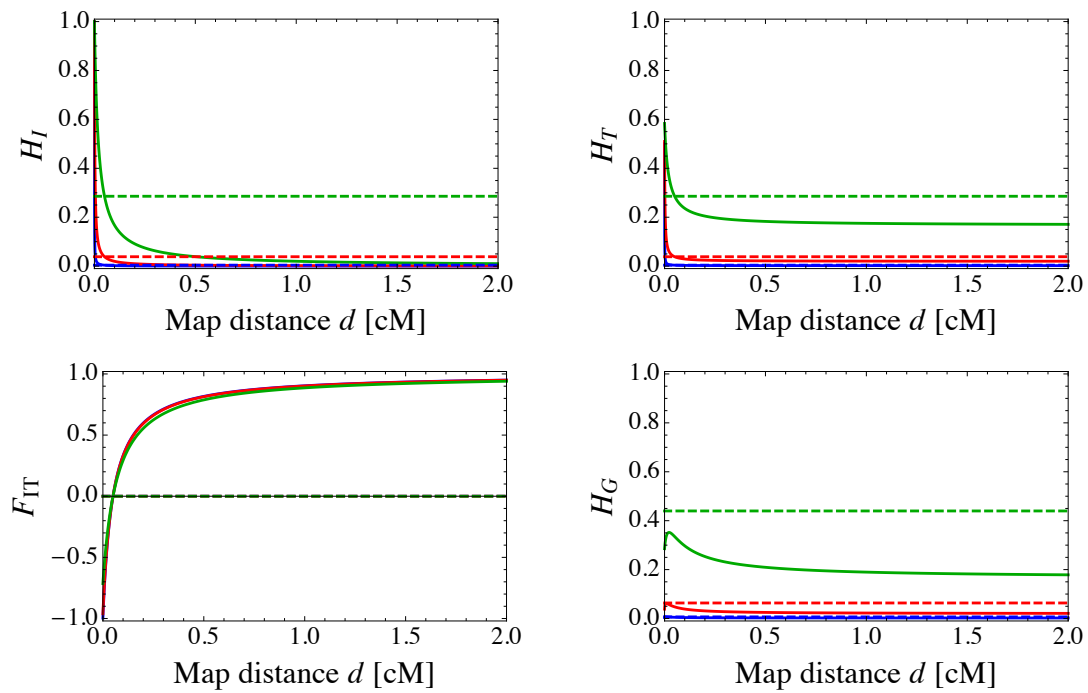

972

973 Figure S2. Equilibrium genetic diversity in neutrally evolving populations  
974 reproducing by central fusion automixis. The same analytical results as in Fig.2 are  
975 shown and the same parameters are used ( $N=1000$ ,  $\mu=10^{-7}$  (blue),  $10^{-6}$  (red) and  $10^{-5}$   
976 (green)), but the x-axis is re-scaled to show map distance in centimorgans.

977

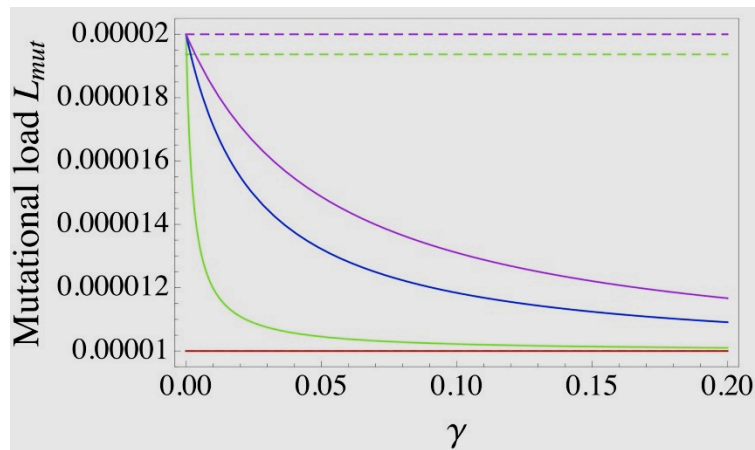

978

979 Figure S3. Mutational load under mutation-selection balance depending on the rate of  
980 heterozygosity degradation  $\gamma$ . Solid lines show mutational loads in automictic  
981 populations and dashed lines show the corresponding loads in outbreeding sexual  
982 populations. Parameters take the values  $s = 0.05$ ,  $\mu = 10^{-5}$  and  $h = 0$  (red),  
983  $h = 0.05$  (green),  $h = 0.5$  (blue), and  $h = 1$  (purple). Note that for the latter two  
984 values of  $h$ , the mutational loads in sexual populations are indistinguishable in this  
985 plot, and that for completely recessive mutations, the genetic load in both sexual and  
986 automictic populations is equal to  $\mu$ .

987

988
